# Supplementary material for: Total synthesis of Palmarumycin BGs, C1and Guignardin E
Source: Royal Society of Chemistry journal article supplement (doi:10.1039/c9ra10316c), 2020-01-01
Supplement: c9ra10316c1.pdf [file c9ra10316c1.pdf]

Electronic Supplementary Material (ESI) for RSC Adv.

This journal is © The Royal Society of Chemistry 2019

## Supporting information

### Total Synthesis of Palmarumycin BGs, C<sub>1</sub> and Guignardin E

Xinlei Liu<sup>a</sup>, Shuyi Li<sup>a</sup>, Xinyu Wei<sup>a</sup>, Yu Zhao<sup>a</sup>, Daowan Lai<sup>b</sup>, Ligang Zhou<sup>b</sup>, and Mingan Wang<sup>a,\*</sup>

<sup>a</sup>Department of Applied Chemistry, College of Sciences, China Agricultural University, Beijing 100193, People's Republic of China;

<sup>b</sup>Department of Plant Pathology, College of Plant Protection, China Agricultural University, Beijing 100193, People's Republic of China.

E-mail: wangma@cau.edu.cn

#### Table of contents

|                                                                                                                      |       |
|----------------------------------------------------------------------------------------------------------------------|-------|
| 1. HPLC, HR-ESI-MS, <sup>1</sup> H and <sup>13</sup> C NMR spectra for compounds <b>1-7</b> , and <b>10-14</b> ..... | 2-20  |
| 2. The crystal structure parameters for compound <b>14</b> .....                                                     | 21-24 |

1. HPLC, HR-ESI-MS, <sup>1</sup>H and <sup>13</sup>C NMR spectra for compounds 1-7, and 10-14

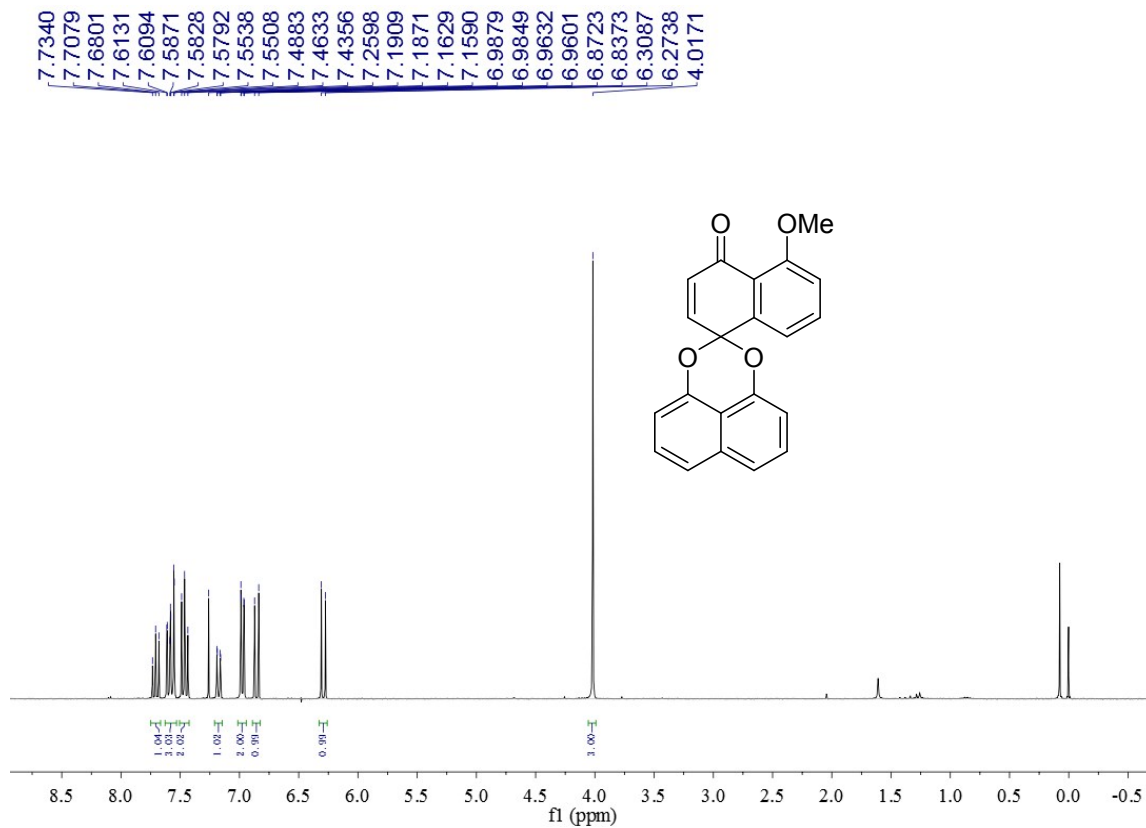

Figure S1 <sup>1</sup>H NMR of compound **10**

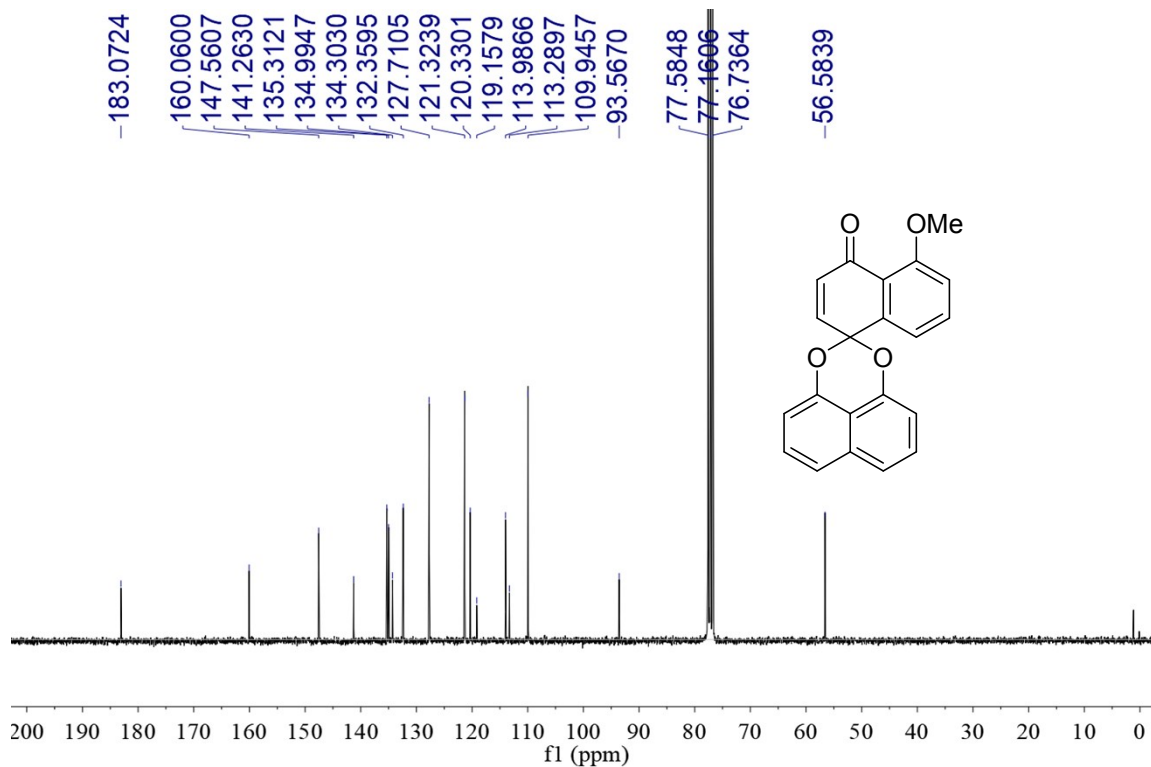

Figure S2 <sup>13</sup>C NMR of compound **10**

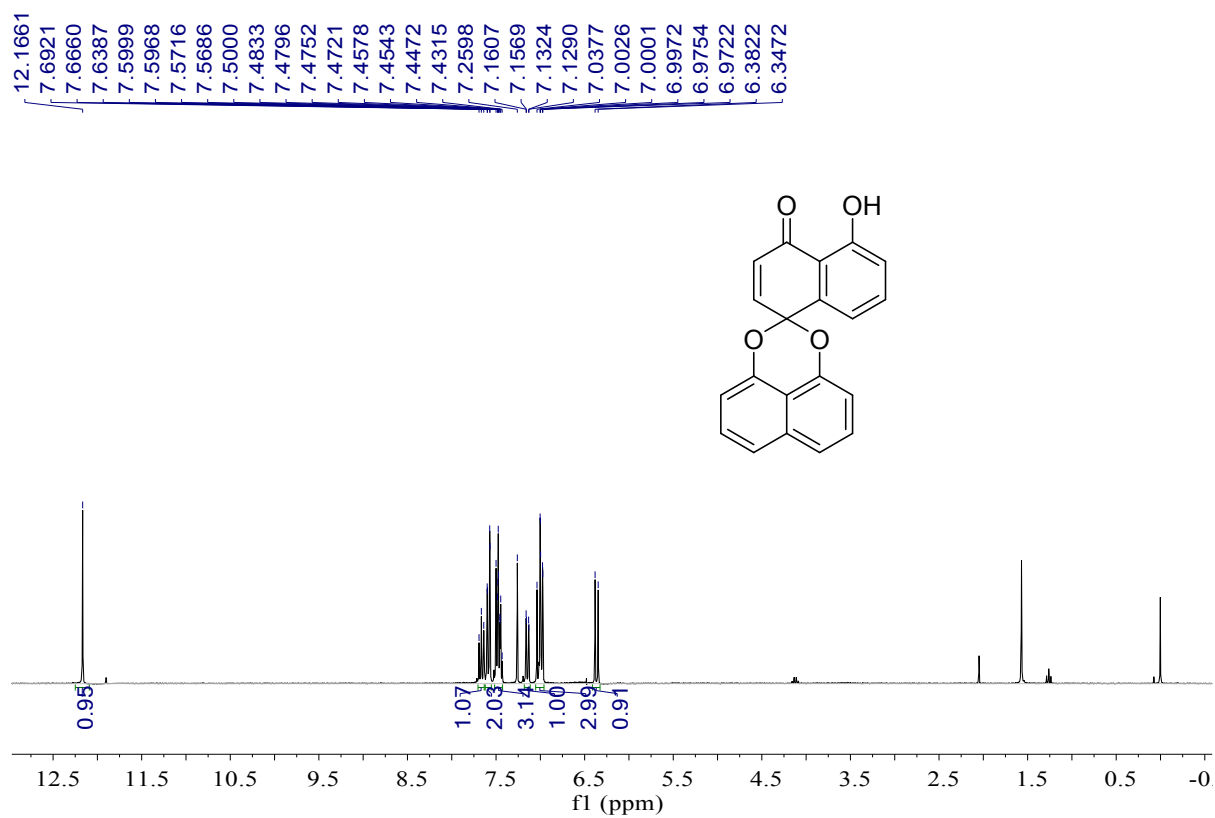

Figure S3 <sup>1</sup>H NMR of compound 11

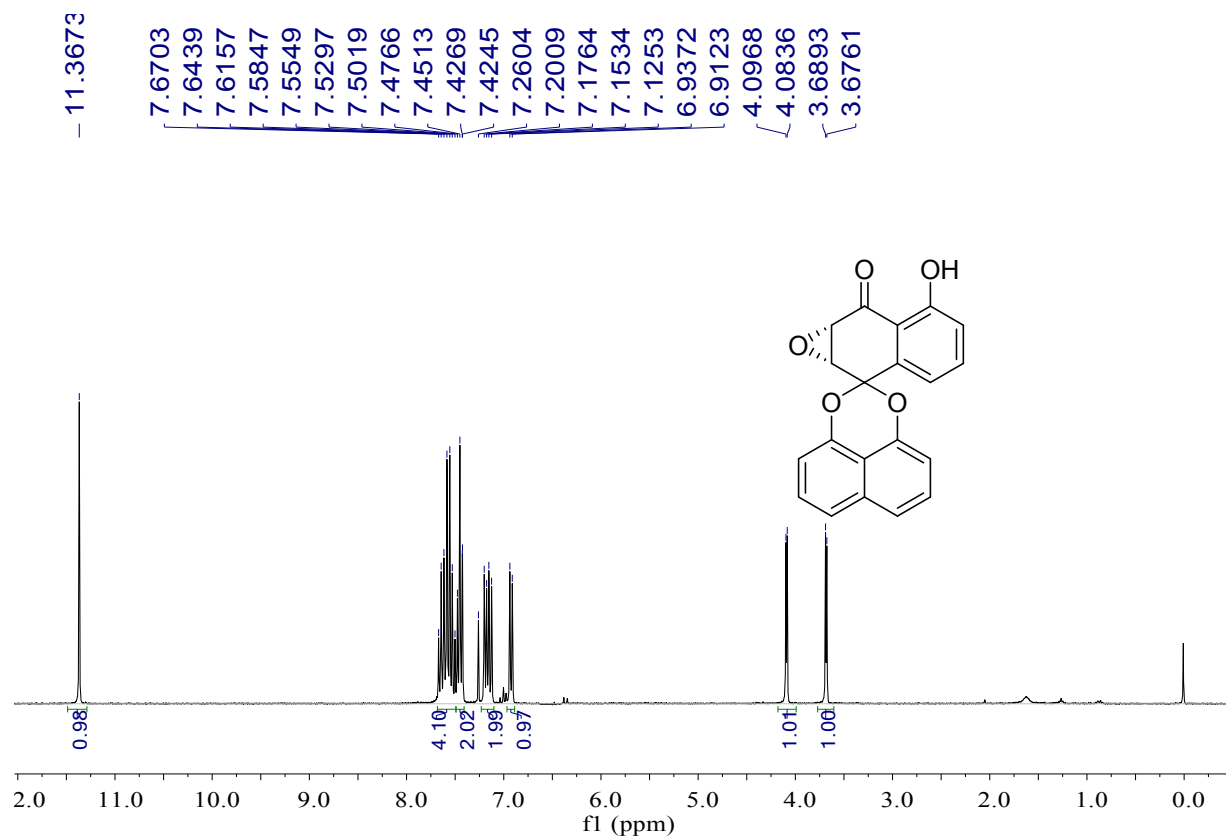

Figure S4 <sup>1</sup>H NMR of compound 12

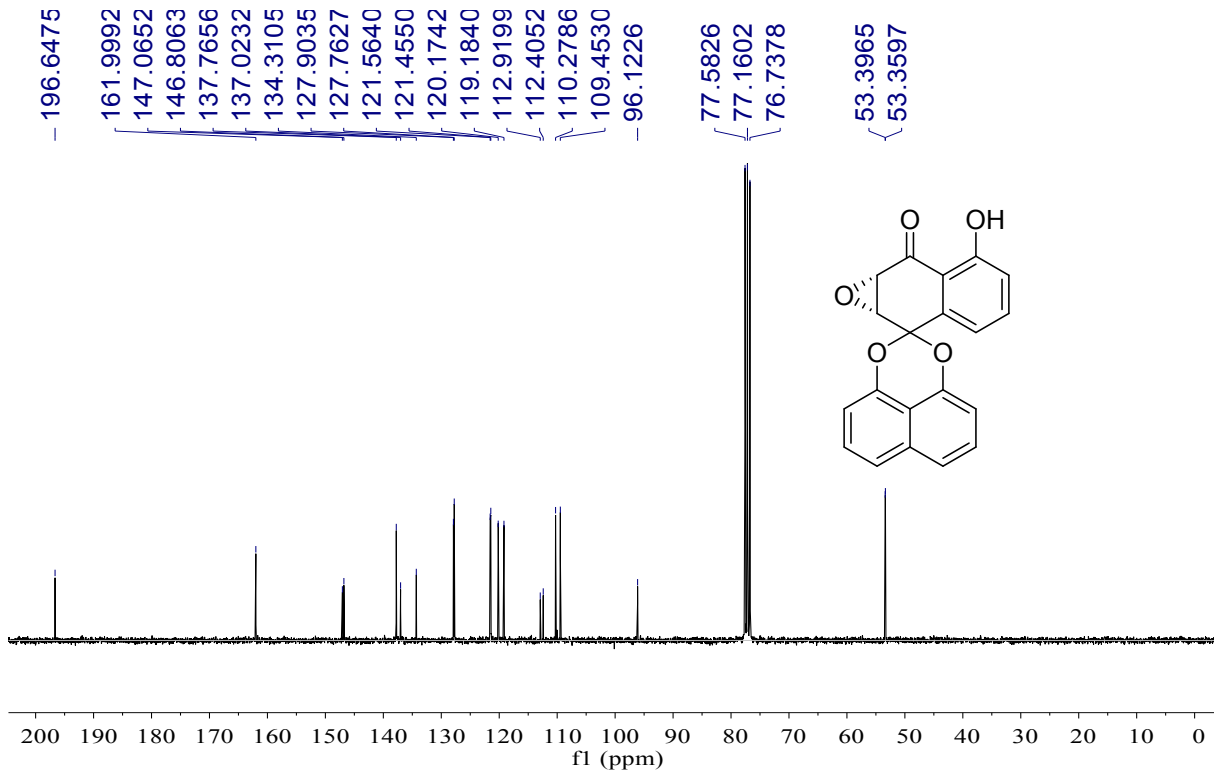

Figure S5 <sup>13</sup>C NMR of compound 12

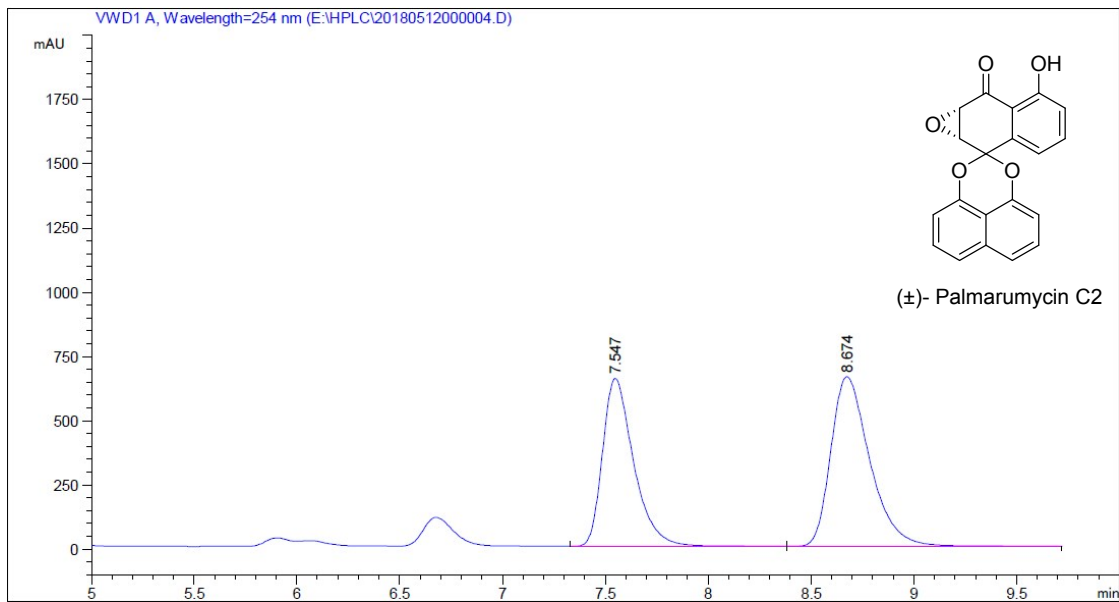

| Peak# | Ret. Time [min] | Area [mAU*s] | Height [mAU] | Conc. [%] |
|-------|-----------------|--------------|--------------|-----------|
| 1     | 7.547           | 6875.209     | 652.997      | 44.172    |
| 2     | 8.674           | 8689.386     | 659.877      | 55.823    |
| Total |                 | 15564.595    |              |           |

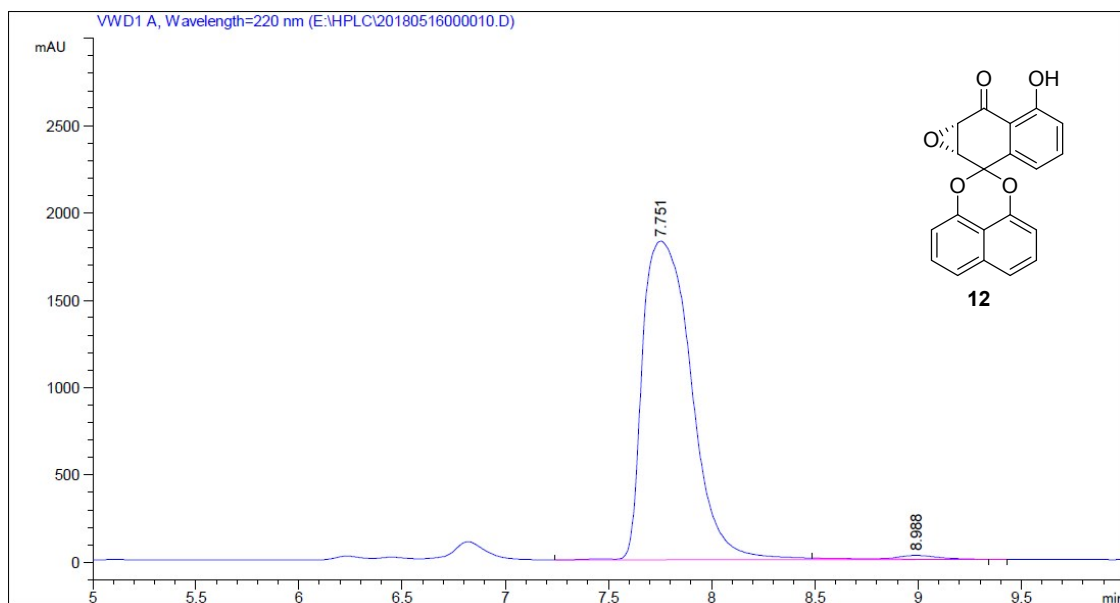

| Peak# | Ret. Time [min] | Area [mAU*s] | Height [mAU] | Conc. [%] |
|-------|-----------------|--------------|--------------|-----------|
| 1     | 7.751           | 3.0038e4     | 1824.567     | 98.989    |
| 2     | 8.988           | 306.8433     | 22.421       | 1.011     |
| Total |                 | 3.0344e4     |              |           |

Figure S6 HPLC profiles of compound (±)- and (-)- Palmarumycin C<sub>2</sub> (**12**)

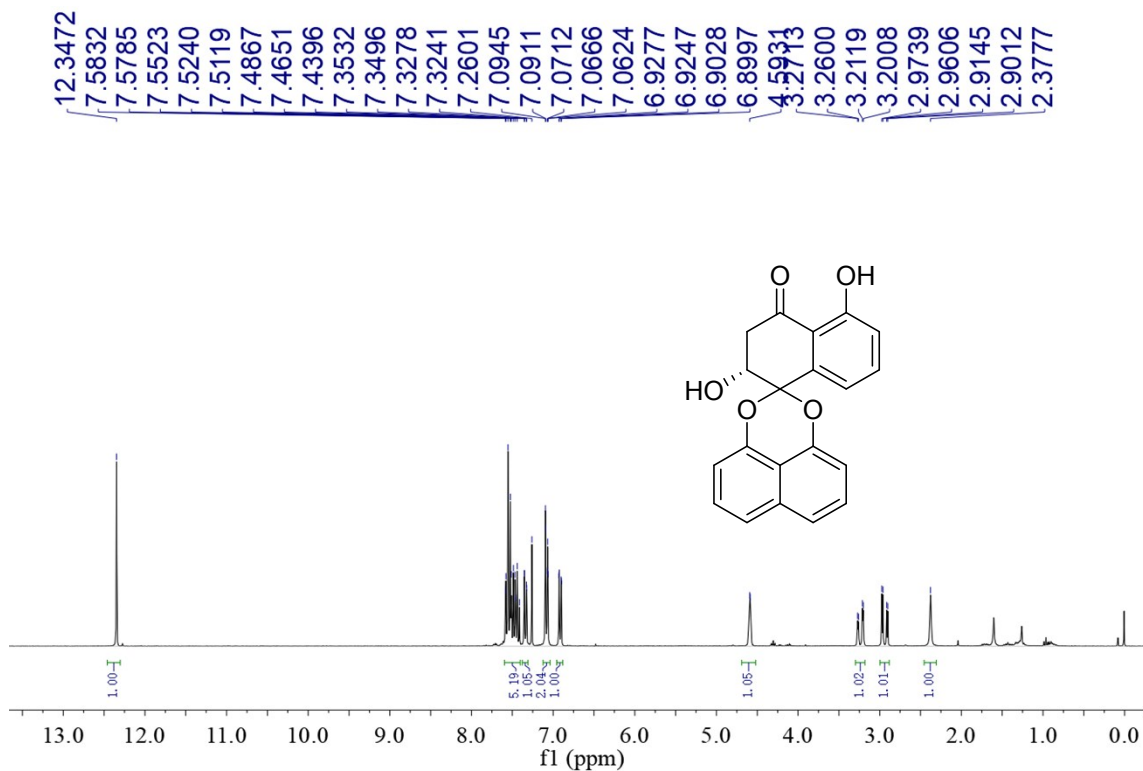

Figure S7 <sup>1</sup>H NMR of compound **1**

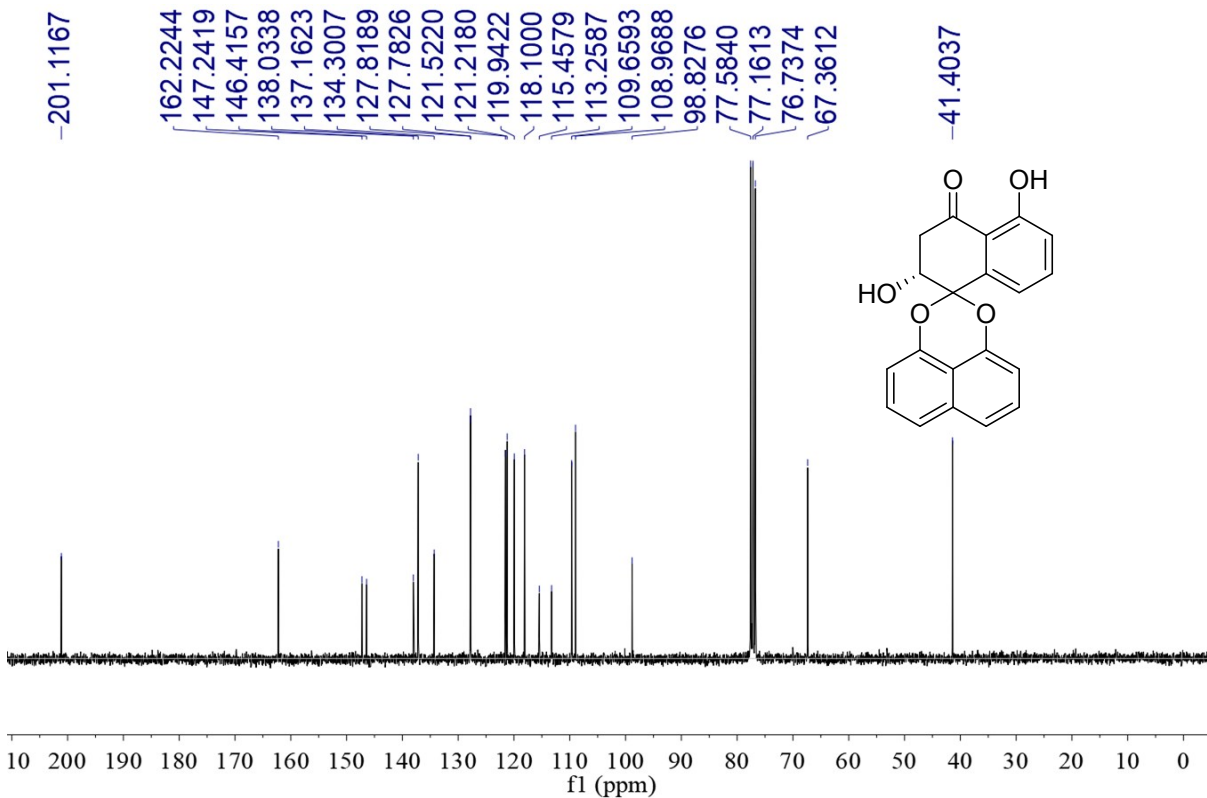

Figure S8  $^{13}\text{C}$  NMR of compound 1

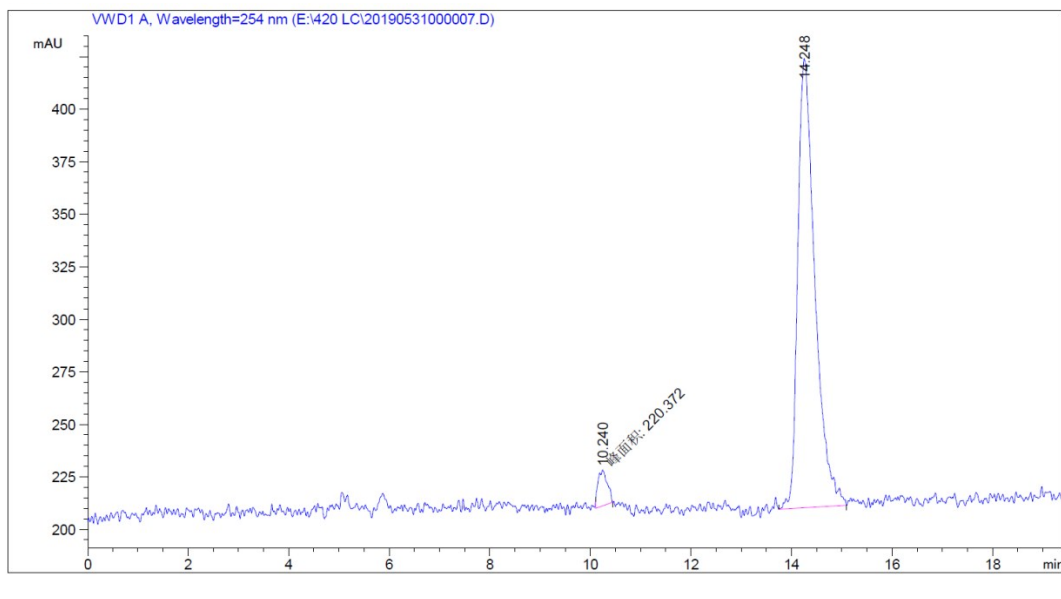

Figure S9 HPLC profile of compound 1

| Peak# | Ret. Time [min] | Area [mAU*s] | Height [mAU] | Conc. [%] |
|-------|-----------------|--------------|--------------|-----------|
| 1     | 10.240          | 220.3720     | 17.0249      | 4.165     |
| 2     | 14.248          | 5069.9824    | 213.7812     | 95.835    |
| Total |                 | 5290.3544    |              |           |

| Sample No. | Formula (M)                                    | Ion Formula        | Measured m/z | Calc m/z |
|------------|------------------------------------------------|--------------------|--------------|----------|
| <b>1</b>   | C <sub>20</sub> H <sub>14</sub> O <sub>5</sub> | [M-H] <sup>-</sup> | 333.0791     | 333.0768 |

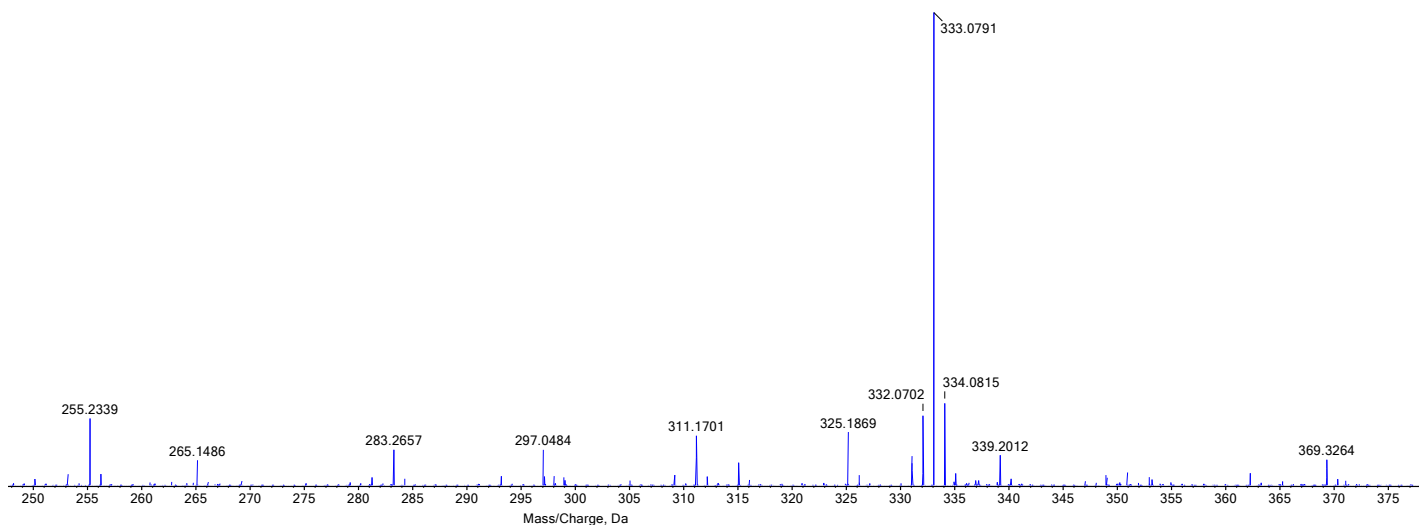

Figure S10 HR-ESI-MS of compound **1**

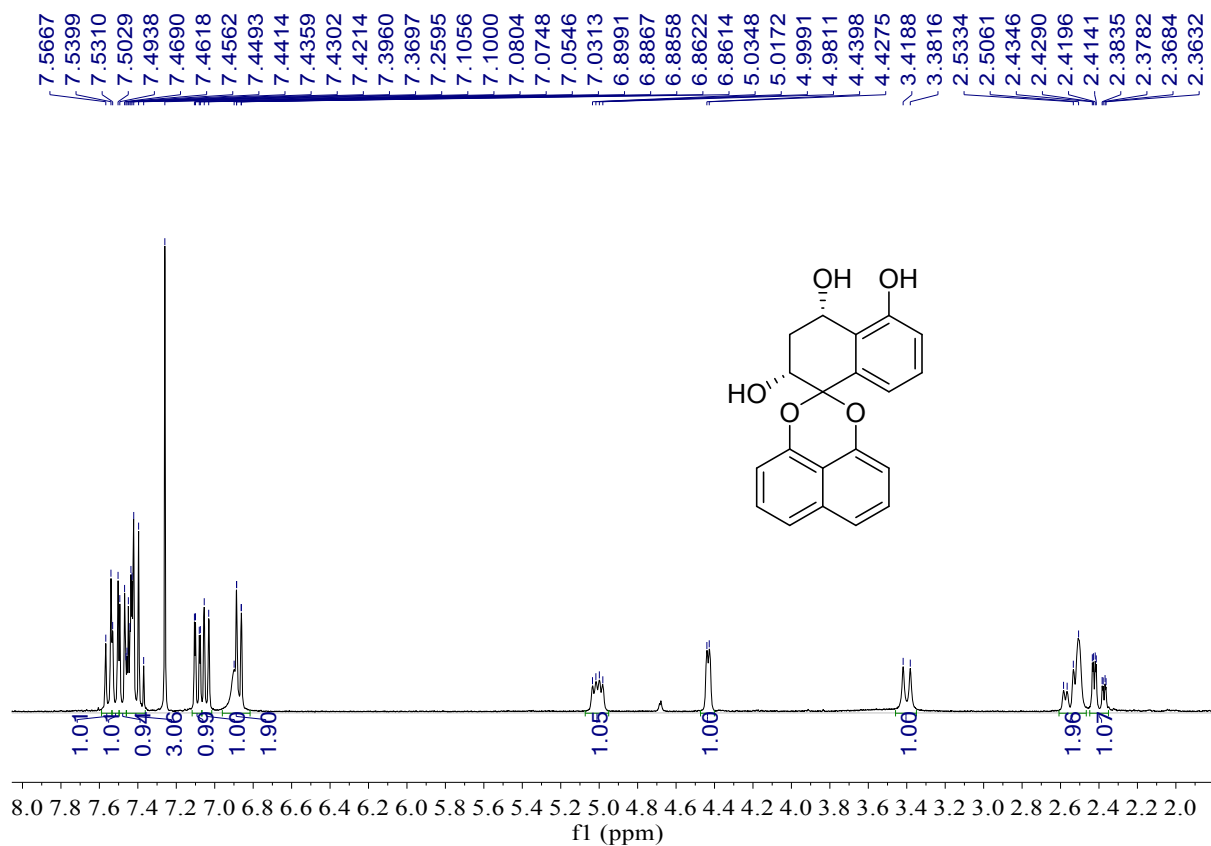

Figure S11 <sup>1</sup>H NMR of compound **2**

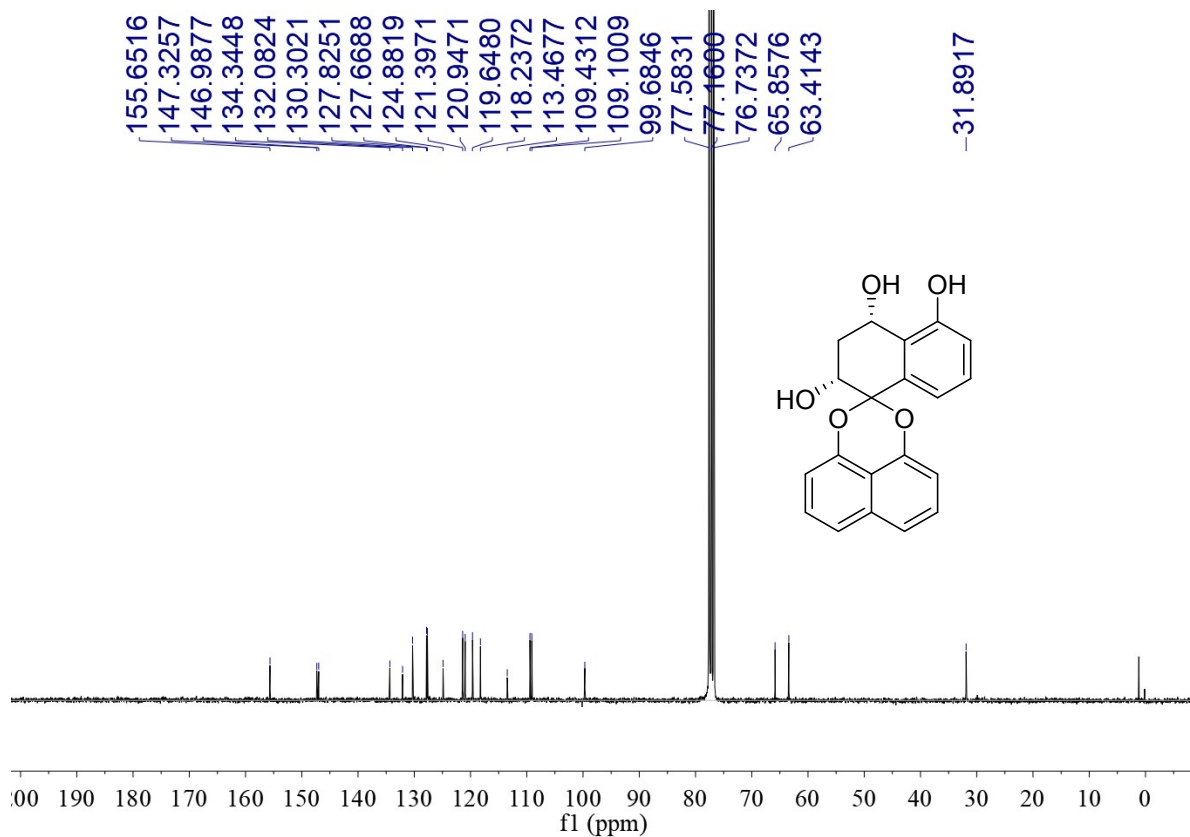

Figure S12  $^{13}\text{C}$  NMR of compound 2

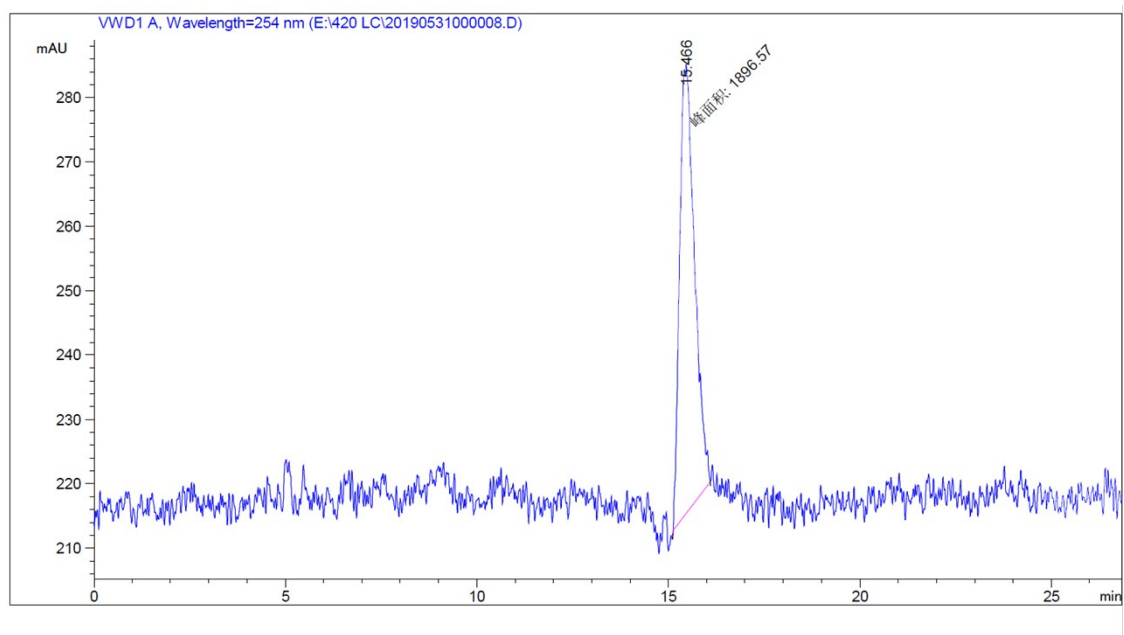

Figure S13 HPLC profile of compound 2



| Sample No. | Formula (M)                                    | Ion Formula        | Measured m/z | Calc m/z |
|------------|------------------------------------------------|--------------------|--------------|----------|
| 2          | C <sub>20</sub> H <sub>16</sub> O <sub>5</sub> | [M-H] <sup>-</sup> | 335.0954     | 335.0925 |

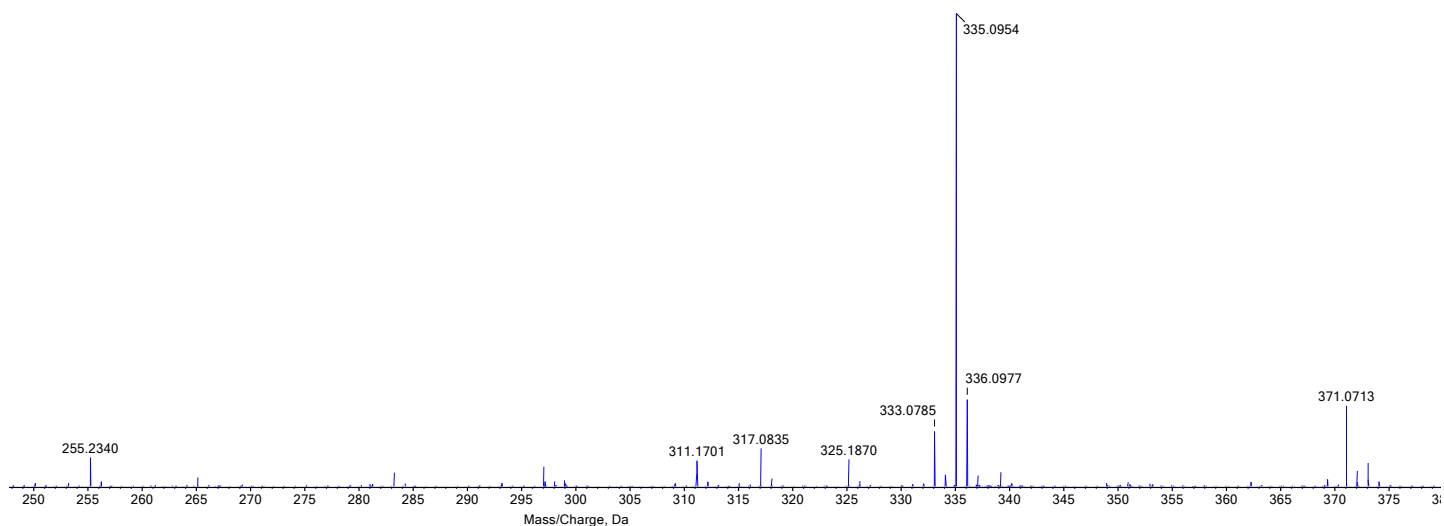

Figure S14 HR-ESI-MS of compound 2

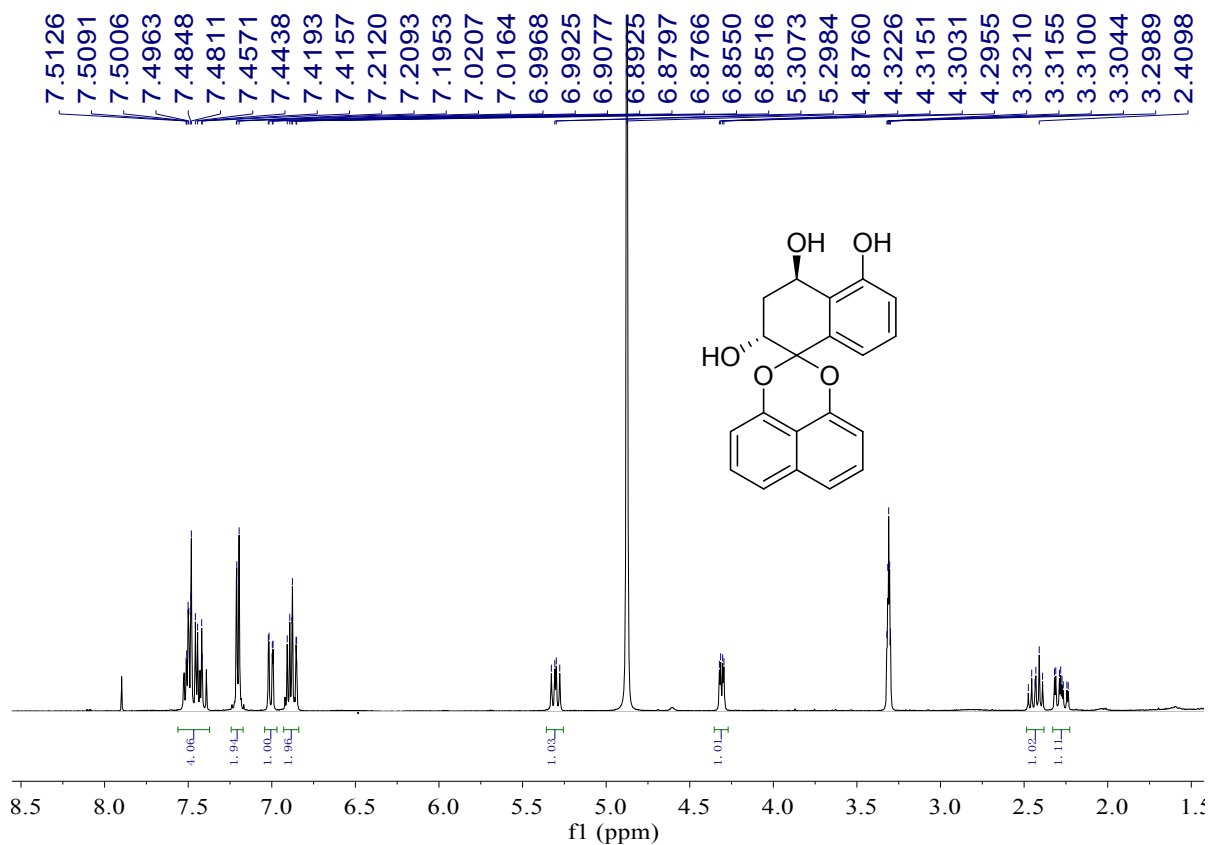

Figure S15 <sup>1</sup>H NMR of compound 3

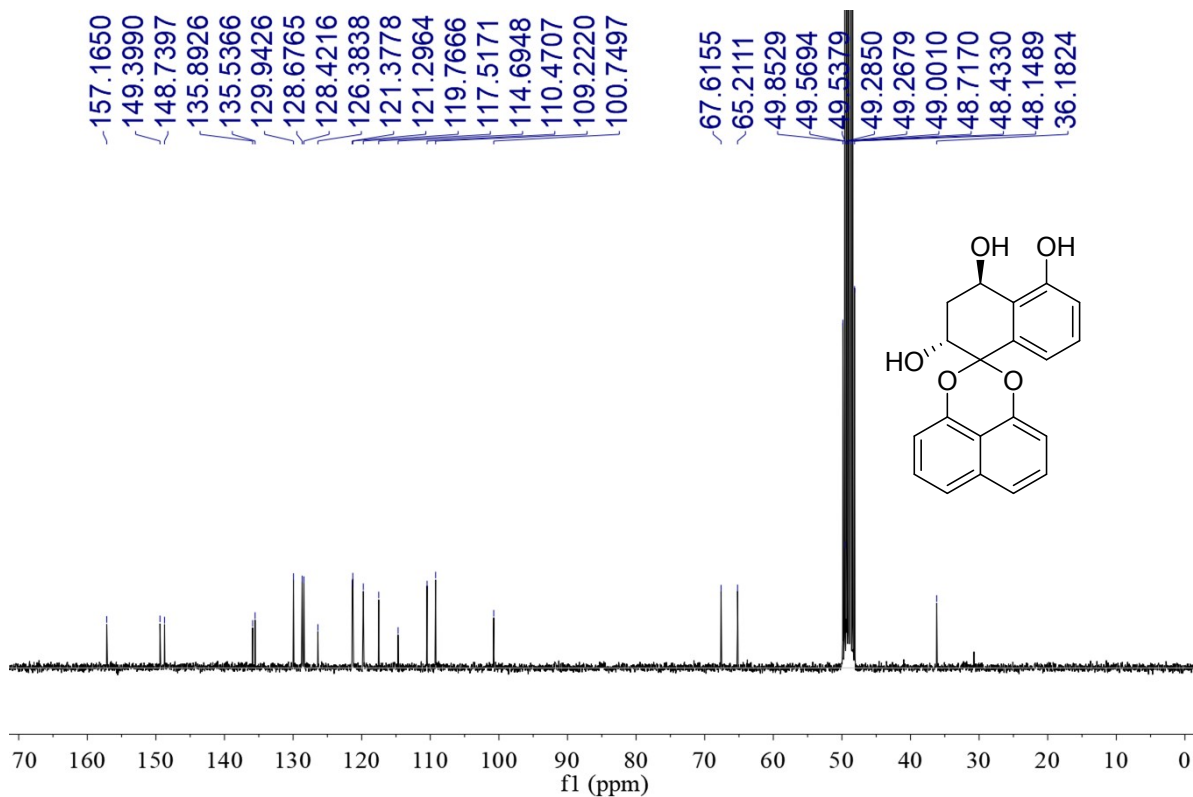

Figure S16 <sup>13</sup>C NMR of compound 3

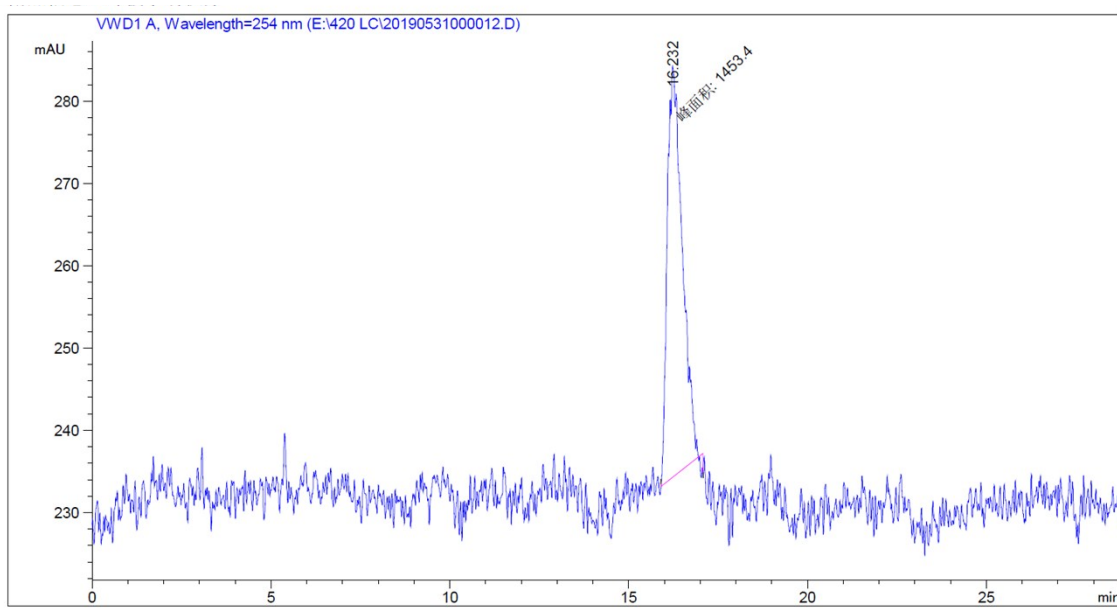

Figure S17 HPLC profile of compound 3

| Sample No. | Formula (M)                                    | Ion Formula        | Measured m/z | Calc m/z |
|------------|------------------------------------------------|--------------------|--------------|----------|
| 3          | C <sub>20</sub> H <sub>16</sub> O <sub>5</sub> | [M-H] <sup>-</sup> | 335.0939     | 335.0925 |

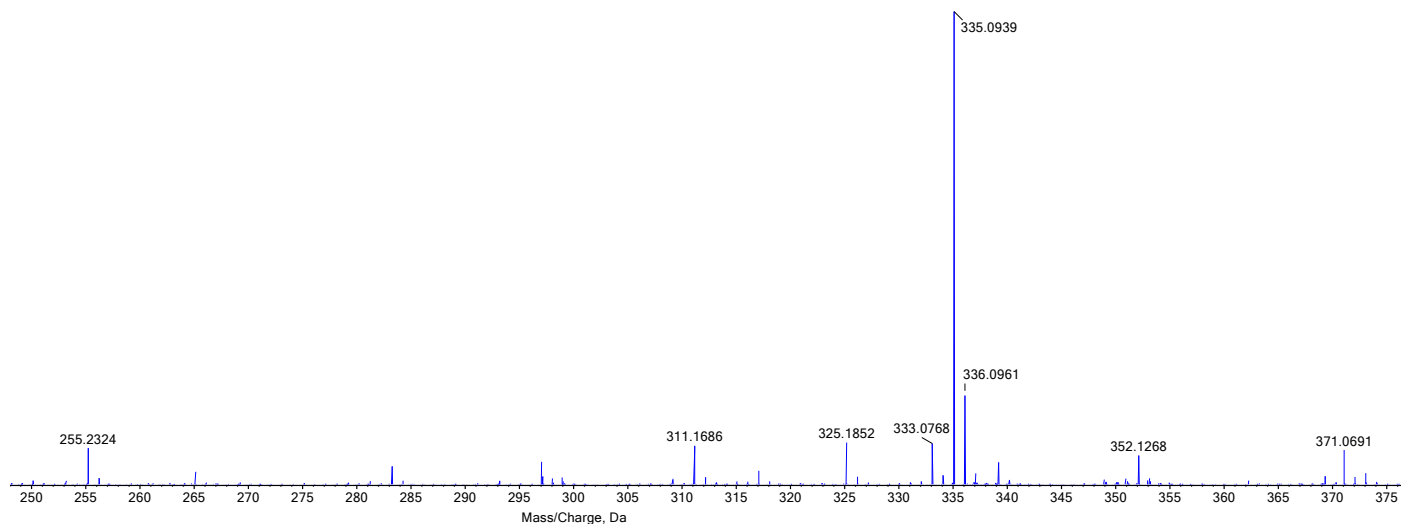

Figure S18 HR-ESI-MS of compound 3

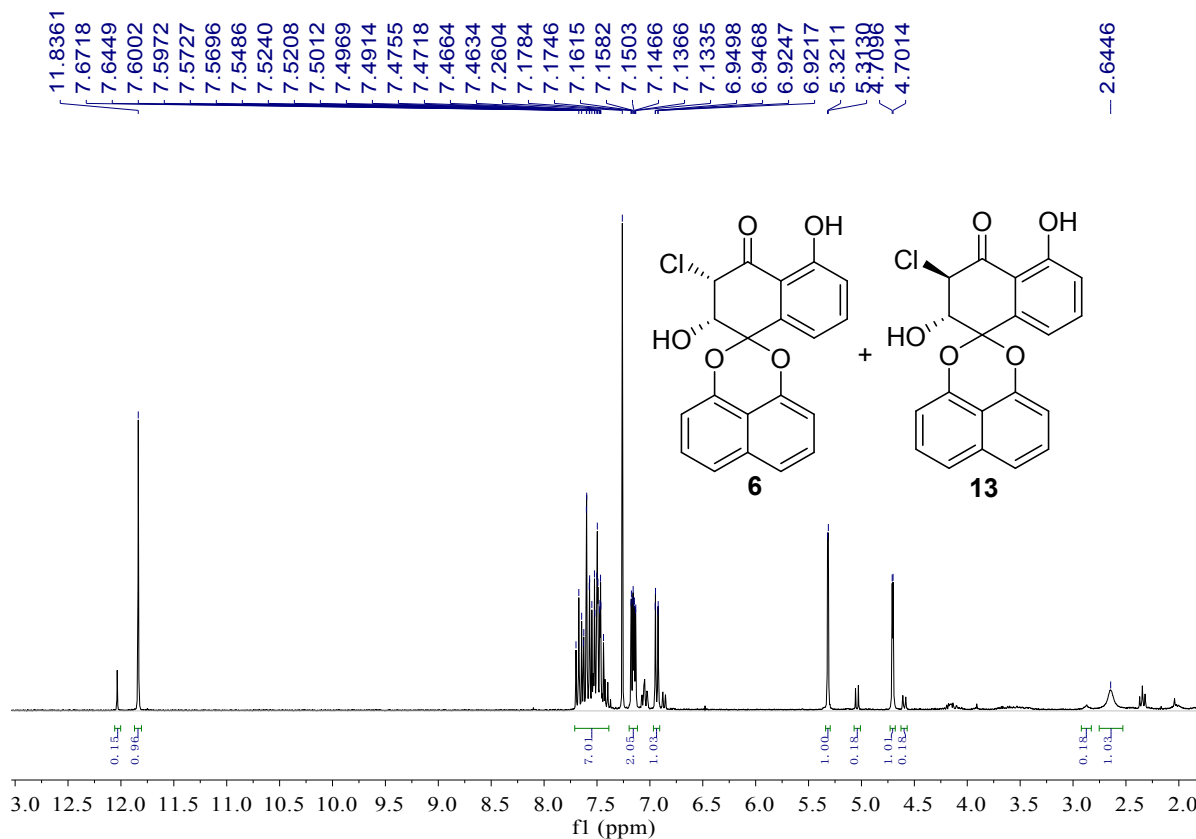

Figure S19 <sup>1</sup>H NMR of the mixture of compound 6 and its C-3 epimer 13 (*dr* = 5.7: 1)

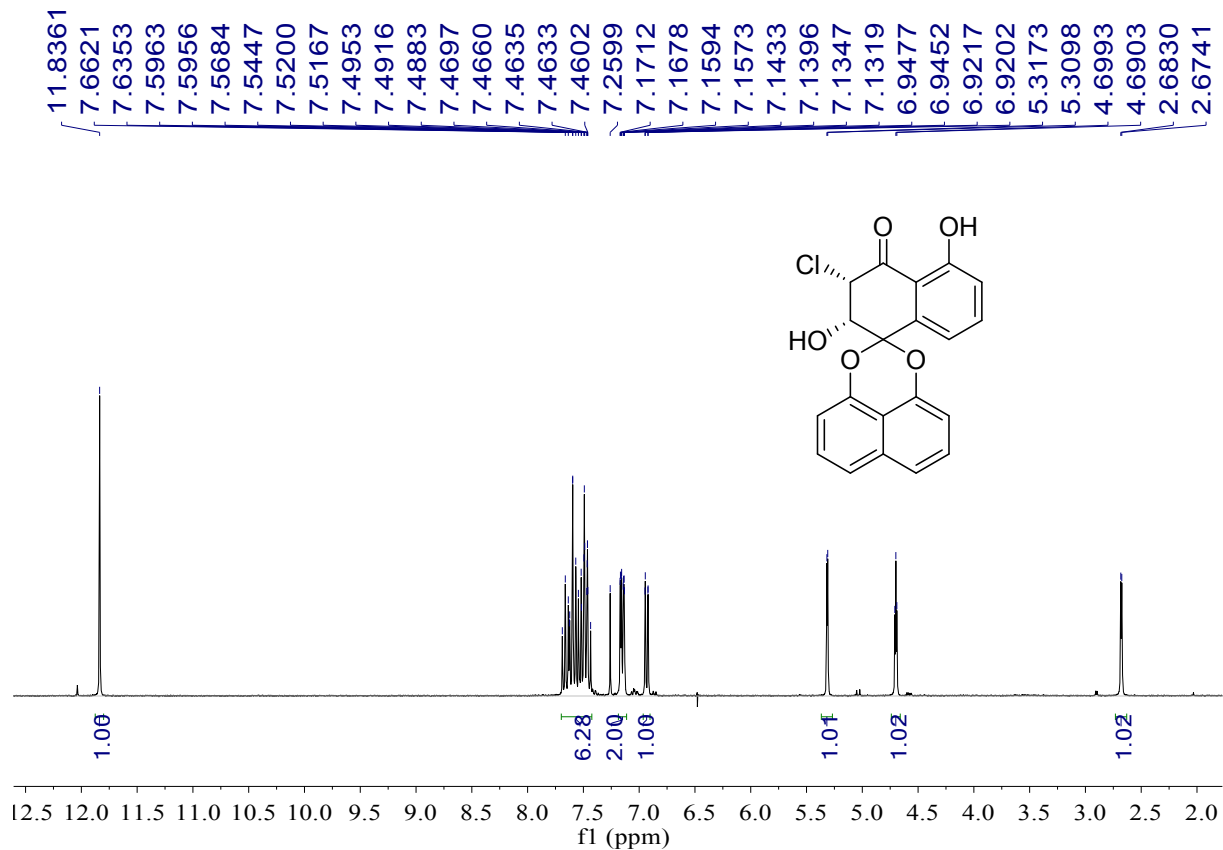

Figure S20 <sup>1</sup>H NMR of compound 6

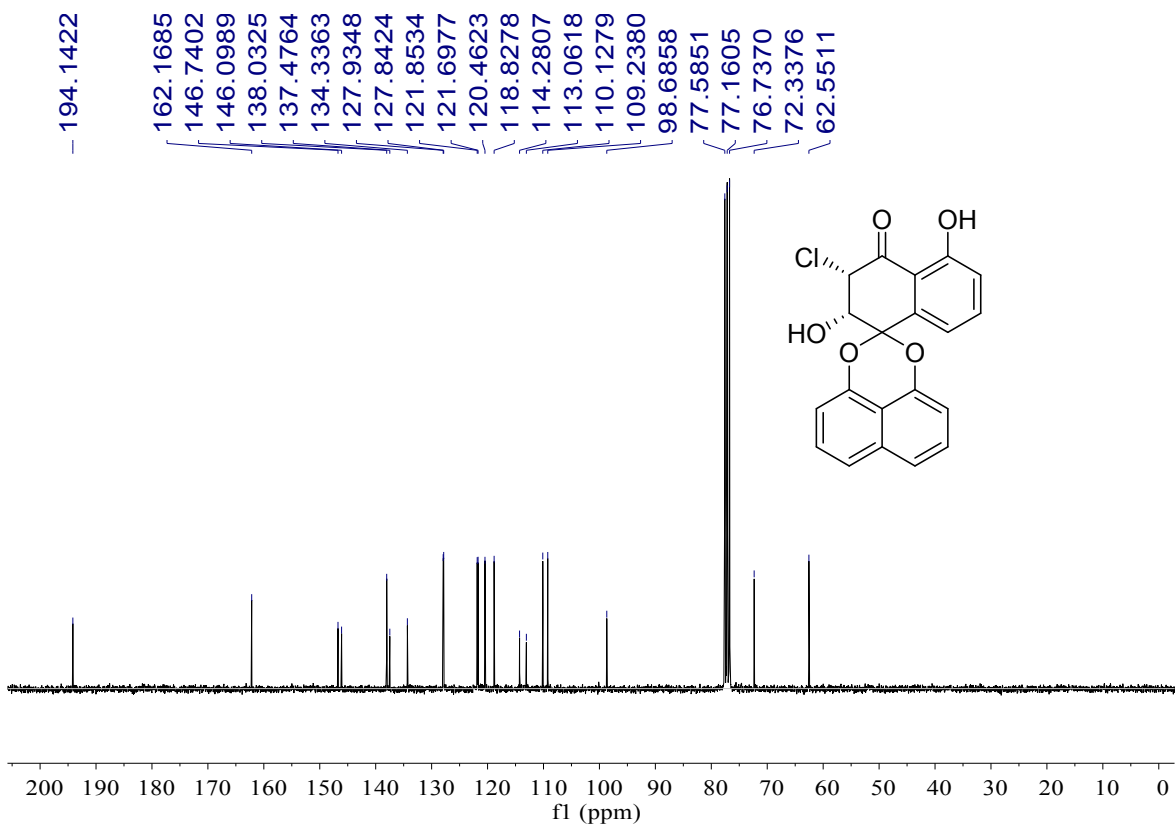

Figure S21 <sup>13</sup>C NMR of compound 6

| Sample No. | Formula (M)                                      | Ion Formula | Measured m/z | Calc m/z |
|------------|--------------------------------------------------|-------------|--------------|----------|
| <b>6</b>   | C <sub>20</sub> H <sub>13</sub> ClO <sub>5</sub> | [M-H]-      | 367.0397     | 367.0379 |

Spectrum from 20190130-tianjin.wiff (sample 4) - sample-4, -TOF MS (350 - 400) from 0.514 min

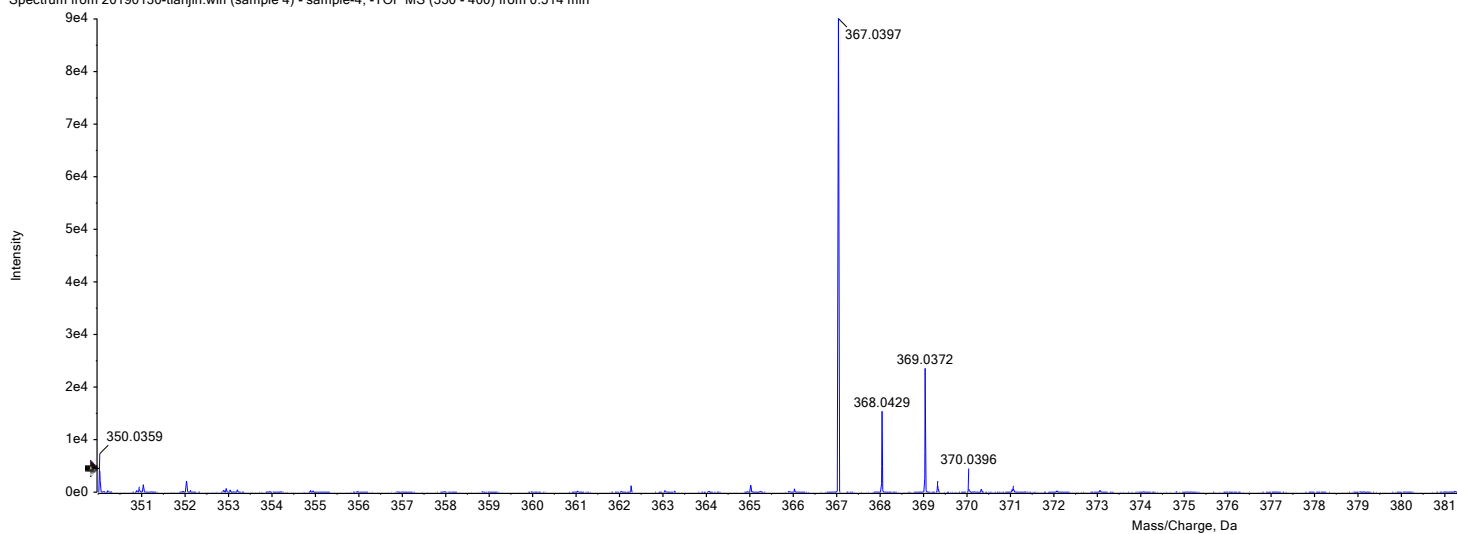

Figure S22 HR-ESI-MS of compound **6**

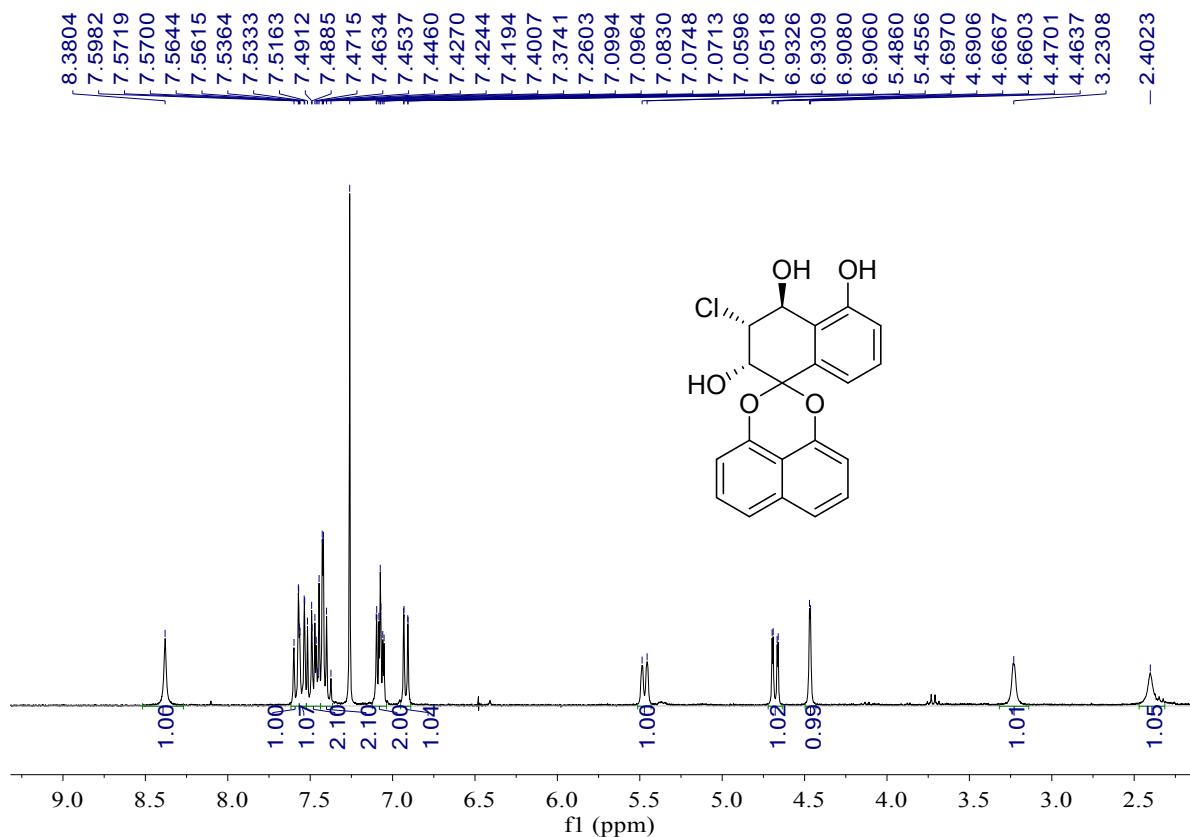

Figure S23 <sup>1</sup>H NMR of compound **4**

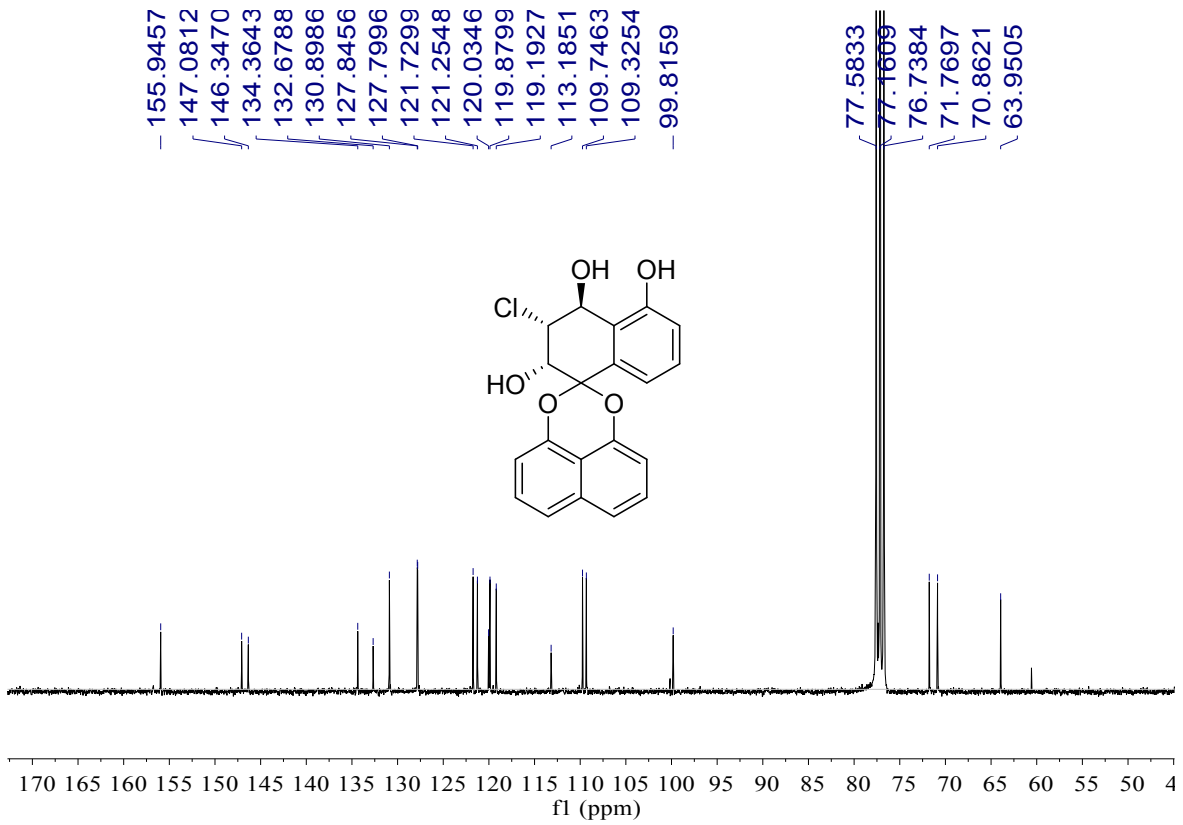

Figure S24 <sup>13</sup>C NMR of compound 4

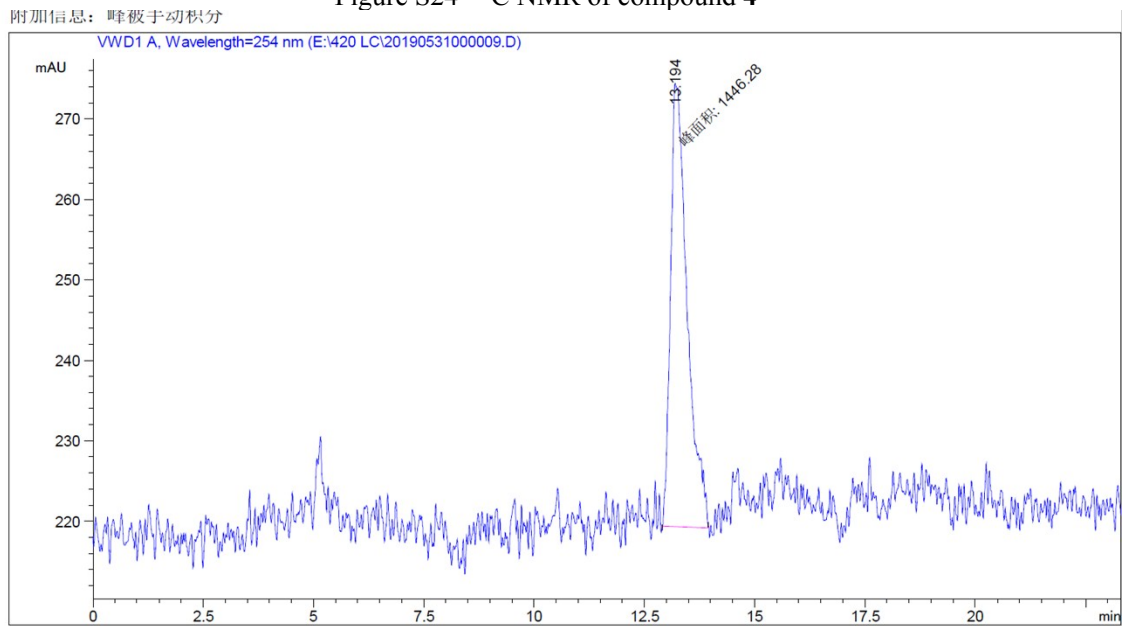

Figure S25 HPLC profile of compound 4

| Sample No. | Formula (M)                                      | Ion Formula        | Measured m/z | Calc m/z |
|------------|--------------------------------------------------|--------------------|--------------|----------|
| 4          | C <sub>20</sub> H <sub>15</sub> ClO <sub>5</sub> | [M-H] <sup>-</sup> | 369.0548     | 369.0535 |

BG5 #386 RT: 3.78 AV: 1 NL: 9.49E9  
T: FTMS - p ESI Full ms [100.0000-1500.0000]

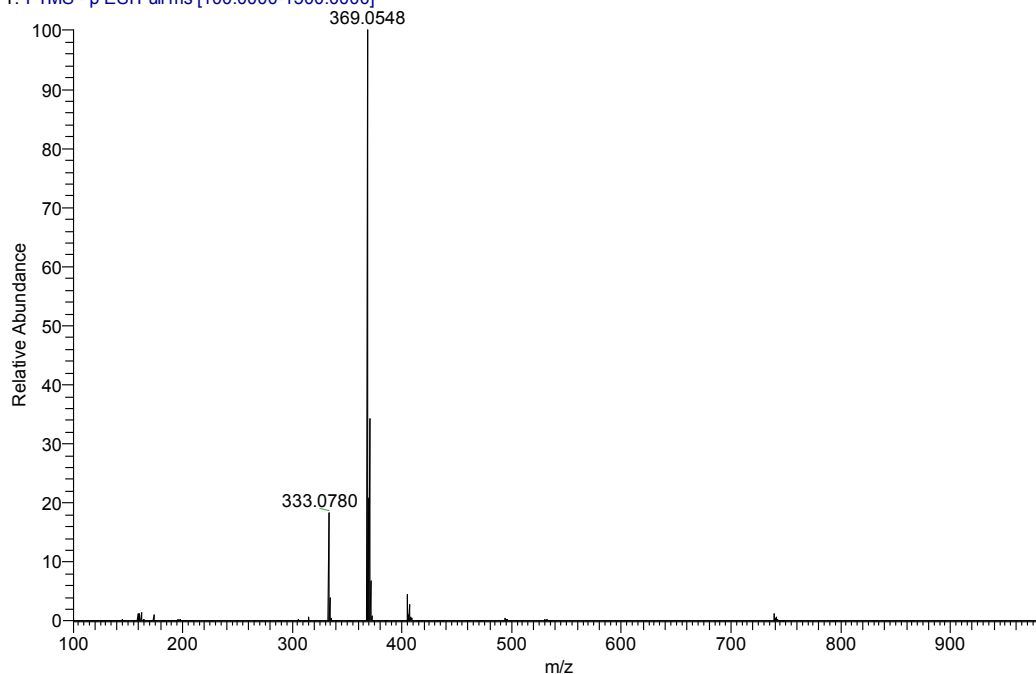

Figure S26 HR-ESI-MS of compound 4

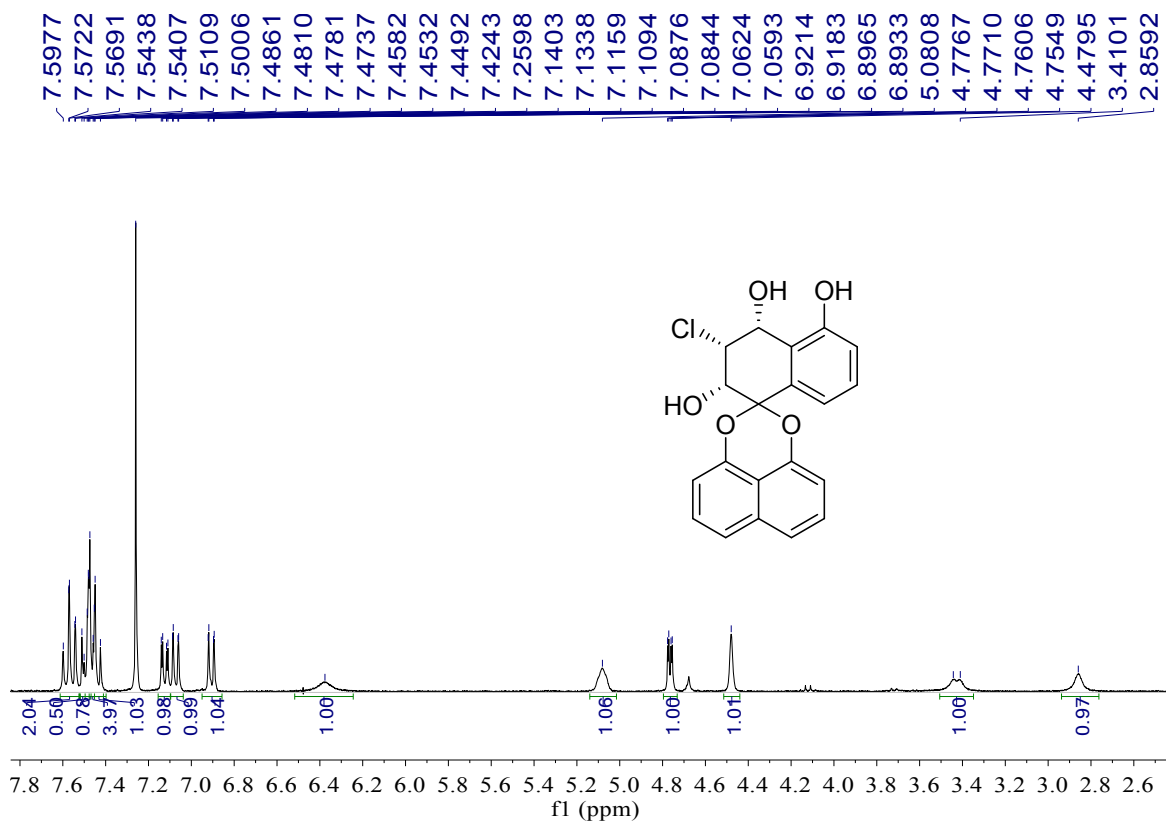

Figure S27 <sup>1</sup>H NMR of compound 14

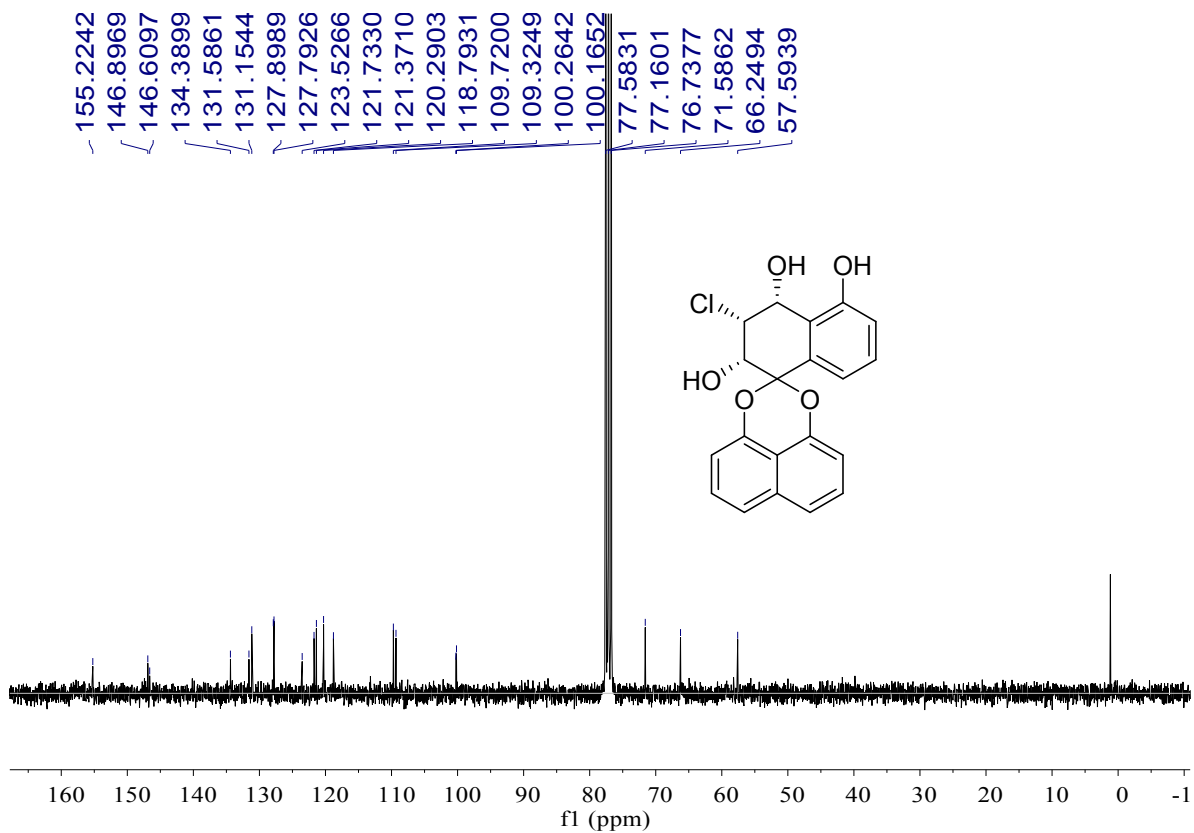

Figure S28  $^{13}\text{C}$  NMR of compound 14

附加信息: 峰被手动积分

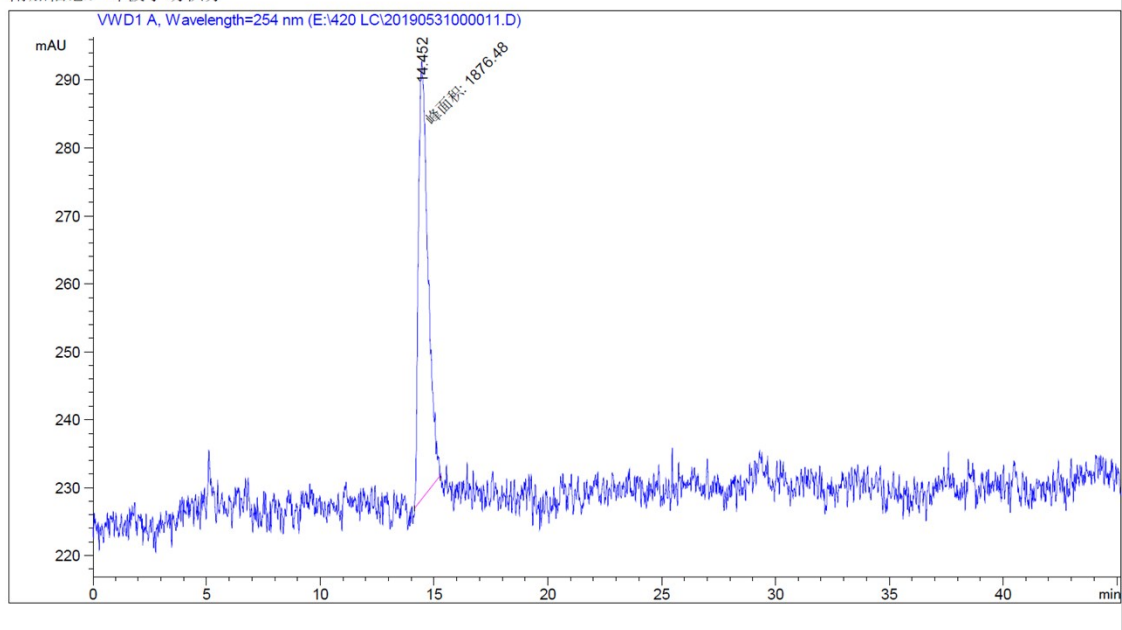

Figure S29 HPLC profile of compound 14



| Sample No. | Formula (M)                                      | Ion Formula        | Measured m/z | Calc m/z |
|------------|--------------------------------------------------|--------------------|--------------|----------|
| <b>14</b>  | C <sub>20</sub> H <sub>15</sub> ClO <sub>5</sub> | [M-H] <sup>-</sup> | 369.0547     | 369.0535 |

BG4 #380 RT: 3.71 AV: 1 NL: 1.19E10  
T: FTMS - p ESI Full ms [100.0000-1500.0000]

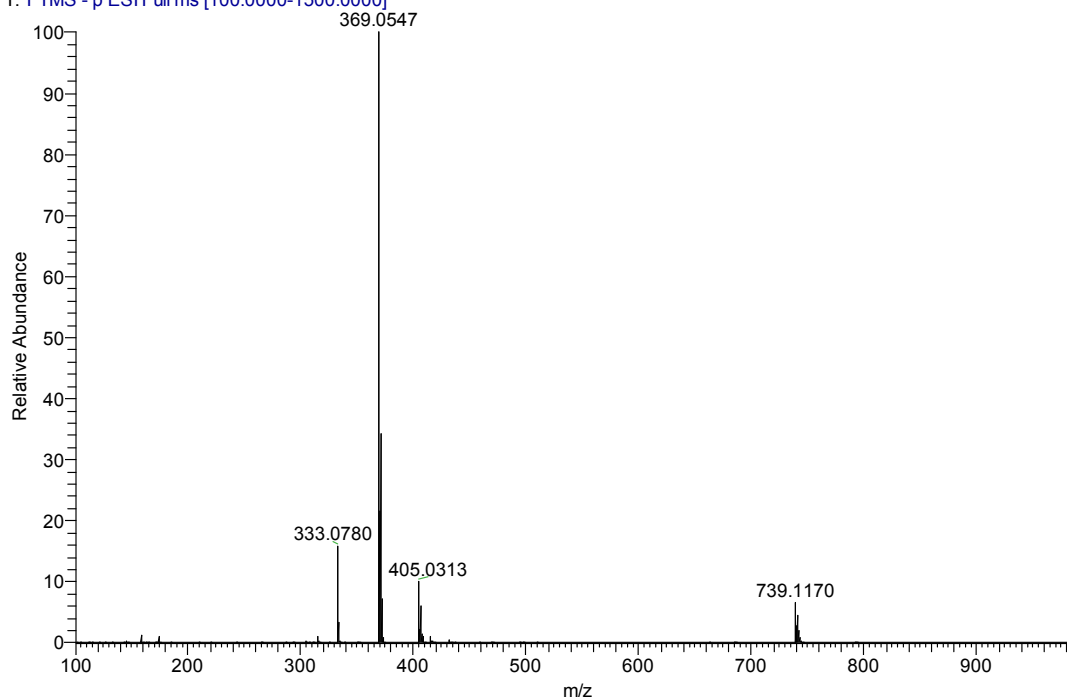

Figure S30 HR-ESI-MS of compound **14**

8.1283  
7.5209  
7.5112  
7.4940  
7.4834  
7.4763  
7.4514  
7.4334  
7.4241  
7.4078  
7.3809  
7.2601  
7.2078  
7.1811  
7.1545  
7.0462  
7.0199  
6.9780  
6.9513  
6.9091  
6.8845  
5.3357  
5.3099  
4.6611  
4.6357  
4.6321  
4.6062  
4.3973  
4.3682  
— 3.5060  
— 2.6366

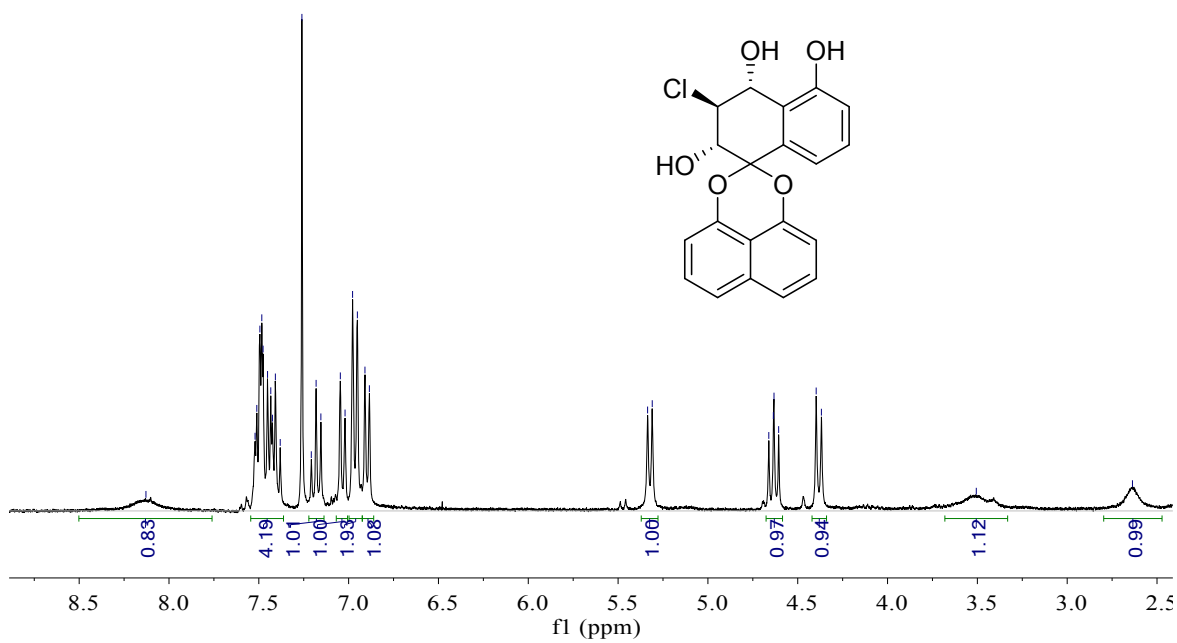

Figure S31 <sup>1</sup>H NMR of compound **5**

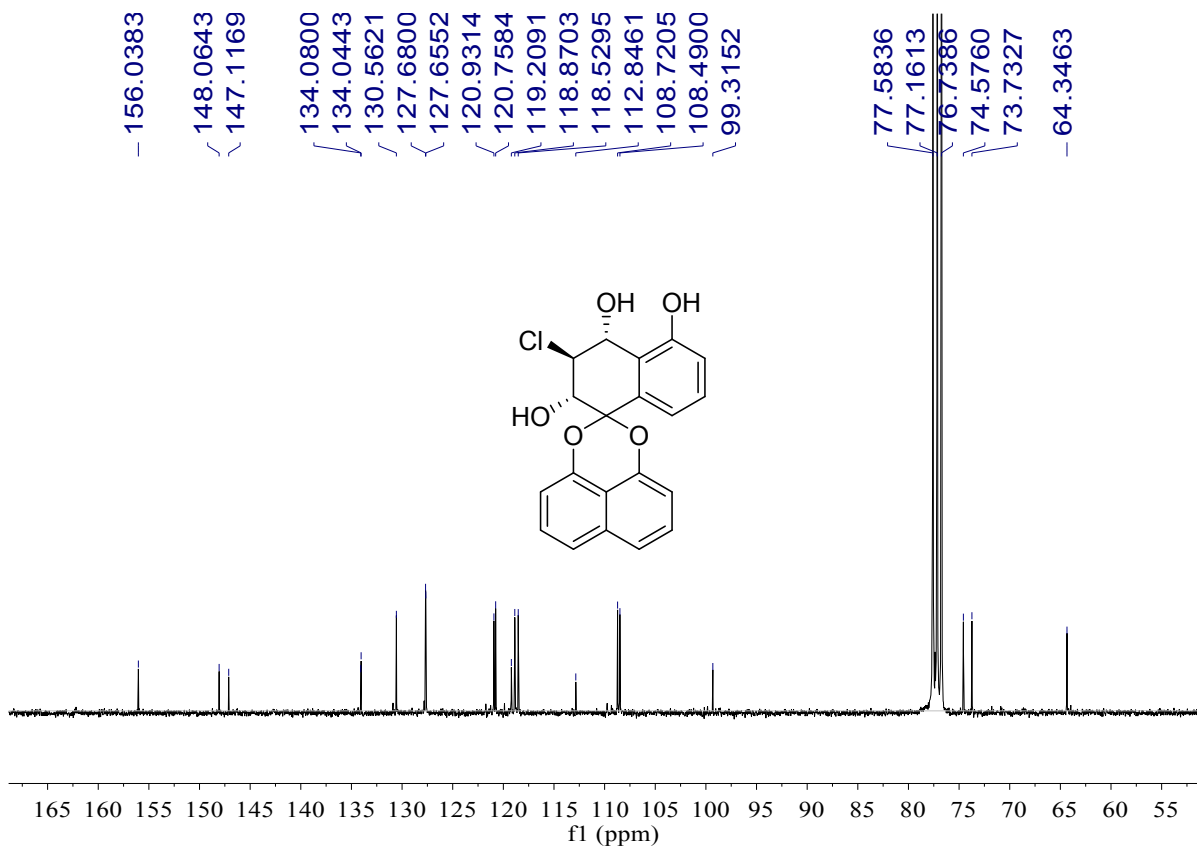

Figure S32 <sup>13</sup>C NMR of compound 5

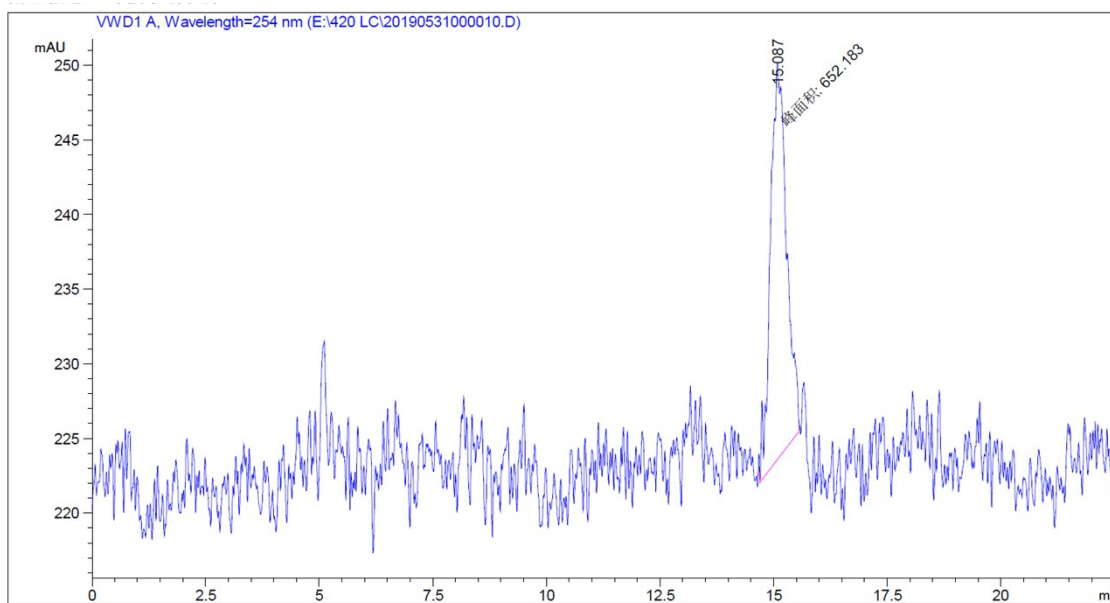

Figure S33 HPLC profile of compound 5

| Sample No. | Formula (M)                                      | Ion Formula        | Measured m/z | Calc m/z |
|------------|--------------------------------------------------|--------------------|--------------|----------|
| <b>5</b>   | C <sub>20</sub> H <sub>15</sub> ClO <sub>5</sub> | [M-H] <sup>-</sup> | 369.0547     | 369.0535 |

BG6 #374 RT: 3.66 AV: 1 NL: 6.76E9  
T: FTMS - p ESI Full ms [100.0000-1500.0000]

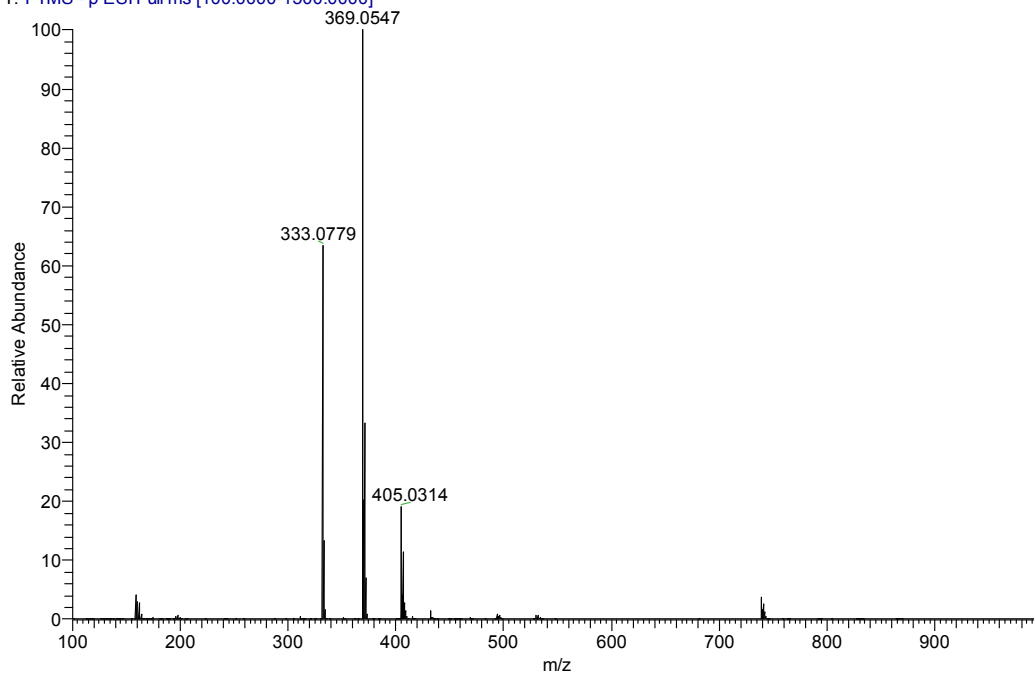

Figure S34 HR-ESI-MS of compound 5

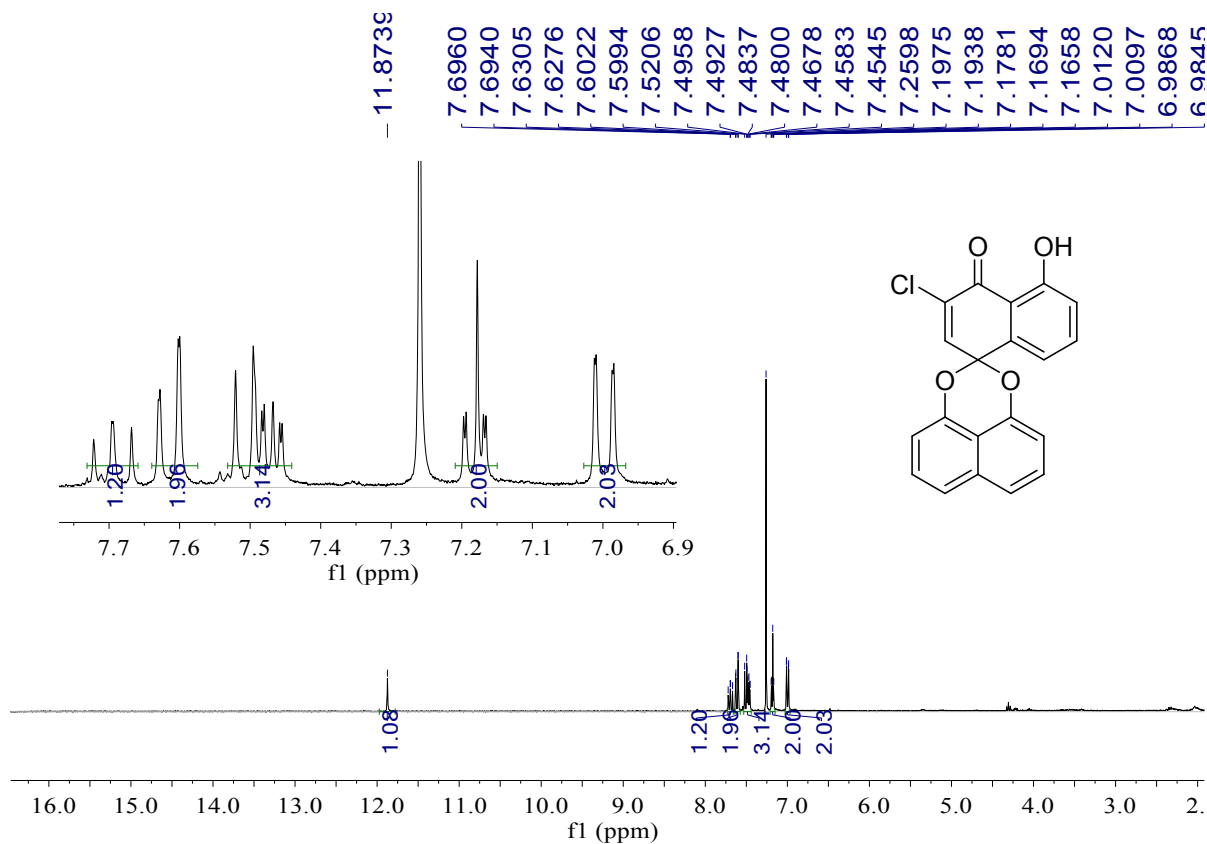

Figure S35 <sup>1</sup>H NMR of compound 7

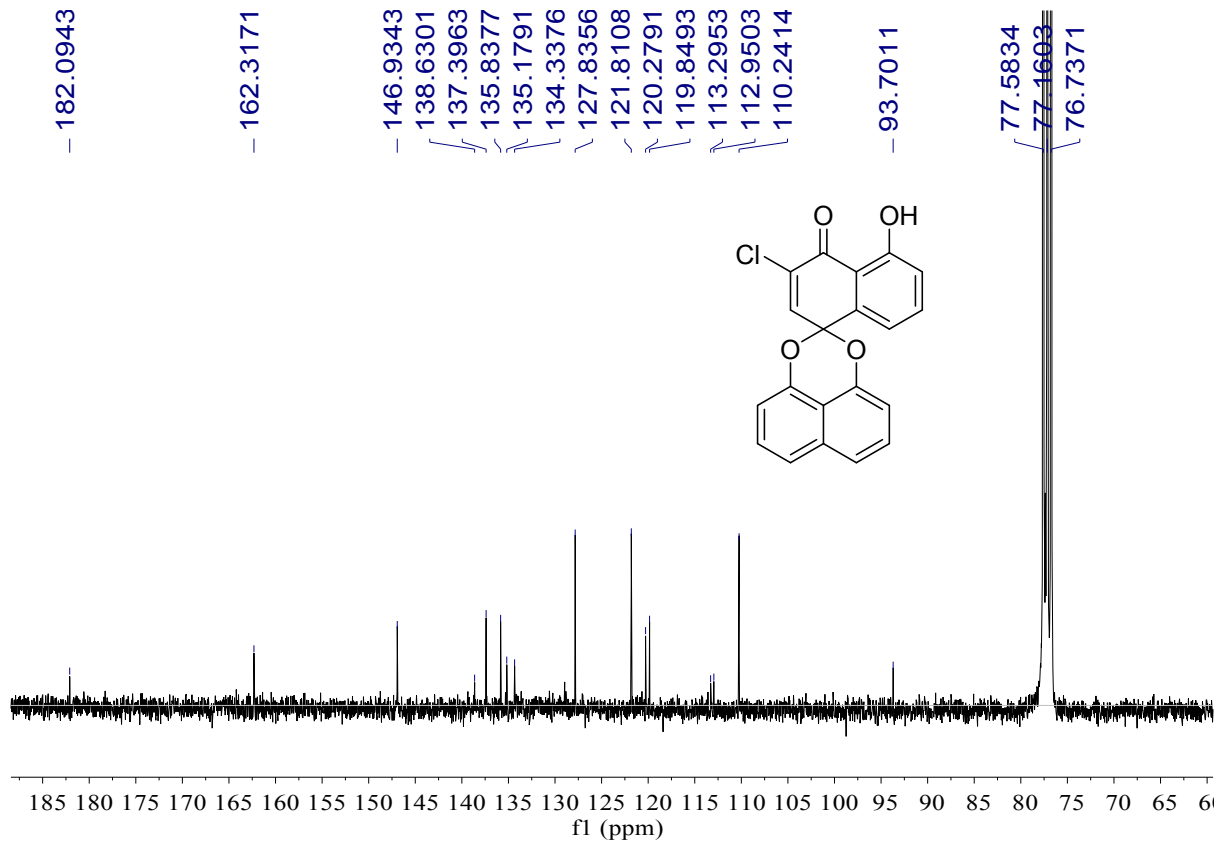

Figure S36 <sup>13</sup>C NMR of compound 7

## 2. The crystal structure parameters for compound 14

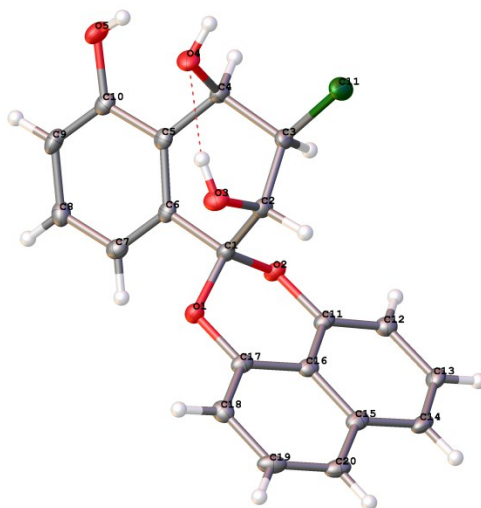

**Table 1:** Crystal data and structure refinement for exp\_6109

|                                                                         |                                                   |
|-------------------------------------------------------------------------|---------------------------------------------------|
| Identification code                                                     | exp_6109                                          |
| Empirical formula                                                       | C <sub>20</sub> H <sub>15</sub> ClO <sub>5</sub>  |
| Formula weight                                                          | 370.77                                            |
| Temperature / K                                                         | 114.0(4)                                          |
| Crystal system                                                          | monoclinic                                        |
| Space group                                                             | P2 <sub>1</sub>                                   |
| a / Å, b / Å, c / Å                                                     | 8.7889(3), 10.1048(5), 8.8667(3)                  |
| α / °, β / °, γ / °                                                     | 90.00, 93.111(3), 90.00                           |
| Volume / Å <sup>3</sup>                                                 | 786.30(6)                                         |
| Z                                                                       | 2                                                 |
| ρ <sub>calc</sub> / mg mm <sup>-3</sup>                                 | 1.566                                             |
| μ / mm <sup>-1</sup>                                                    | 2.434                                             |
| F(000)                                                                  | 384                                               |
| Crystal size / mm <sup>3</sup>                                          | 0.35 × 0.24 × 0.03                                |
| 2θ range for data collection                                            | 10.08 to 142.34°                                  |
| Index ranges                                                            | -10 ≤ h ≤ 10, -11 ≤ k ≤ 12, -9 ≤ l ≤ 10           |
| Reflections collected                                                   | 6127                                              |
| Independent reflections                                                 | 2729 [R(int) = 0.0362 (inf-0.9 Å)]                |
| Data/restraints/parameters                                              | 2729/1/238                                        |
| Goodness-of-fit on F <sup>2</sup>                                       | 1.042                                             |
| Final R indexes [I > 2σ (I) i.e. F <sub>o</sub> > 4σ (F <sub>o</sub> )] | R <sub>1</sub> = 0.0379, wR <sub>2</sub> = 0.0975 |
| Final R indexes [all data]                                              | R <sub>1</sub> = 0.0394, wR <sub>2</sub> = 0.0990 |
| Largest diff. peak/hole / e Å <sup>-3</sup>                             | 0.358/-0.316                                      |
| Flack Parameters                                                        | 0.006(16)                                         |
| Completeness                                                            | 0.9993                                            |

**Table 2** Fractional Atomic Coordinates ( $\times 10^4$ ) and Equivalent Isotropic Displacement Parameters ( $\text{\AA}^2 \times 10^3$ ) for exp\_6109.  $U_{eq}$  is defined as 1/3 of the trace of the orthogonalised  $U_{ij}$  tensor.

| Atom | x           | y          | z          | U(eq)     |
|------|-------------|------------|------------|-----------|
| C11  | 1905.7(7)   | 1342.1(7)  | 1431.9(7)  | 28.48(18) |
| O1   | 397.2(18)   | 6008.5(18) | 3231.1(17) | 16.1(4)   |
| O2   | 53.0(19)    | 4145.1(18) | 4783.0(18) | 15.7(4)   |
| O5   | -3985.4(19) | 2522(2)    | -55.5(19)  | 22.7(4)   |
| O3   | 1290(2)     | 4482(2)    | 919.3(18)  | 20.5(4)   |
| C3   | 536(3)      | 2442(3)    | 2204(3)    | 16.5(5)   |
| C18  | 2499(3)     | 7489(3)    | 3709(2)    | 17.7(5)   |
| C11  | 1363(3)     | 4437(3)    | 5655(2)    | 15.1(5)   |
| C17  | 1745(2)     | 6352(3)    | 4038(2)    | 15.2(5)   |
| C7   | -2694(3)    | 5405(3)    | 3076(3)    | 17.7(5)   |

|     |          |         |            |         |
|-----|----------|---------|------------|---------|
| C20 | 4362(3)  | 7058(3) | 5788(3)    | 19.9(5) |
| C16 | 2235(3)  | 5550(3) | 5271(3)    | 15.2(5) |
| C15 | 3567(3)  | 5898(3) | 6175(2)    | 17.4(5) |
| C4  | -966(3)  | 2368(3) | 1229(3)    | 16.1(5) |
| C19 | 3828(3)  | 7837(3) | 4603(3)    | 20.5(5) |
| O4  | -724(2)  | 2487(2) | -358.4(17) | 20.3(4) |
| C14 | 3970(3)  | 5083(3) | 7444(3)    | 18.6(5) |
| C13 | 3093(3)  | 4015(3) | 7785(3)    | 17.8(5) |
| C10 | -3519(3) | 3461(3) | 978(3)     | 17.2(5) |
| C6  | -1612(3) | 4496(3) | 2633(2)    | 14.9(5) |
| C5  | -2024(3) | 3482(3) | 1632(2)    | 15.2(5) |
| C8  | -4175(3) | 5346(3) | 2458(3)    | 19.9(5) |
| C9  | -4582(3) | 4389(3) | 1386(3)    | 19.6(5) |
| C12 | 1748(3)  | 3687(3) | 6906(3)    | 17.1(5) |
| C1  | 21(3)    | 4632(3) | 3269(2)    | 14.5(5) |
| C2  | 1146(3)  | 3839(3) | 2336(3)    | 16.2(5) |

Table 3 Anisotropic Displacement Parameters ( $\text{\AA}^2 \times 10^3$ ) for exp\_6109. The Anisotropic displacement factor exponent takes the form:  $-2\pi^2[h^2a^{*2}U_{11} + \dots + 2hka^*b^*U_{12}]$

| Atom | $U_{11}$ | $U_{22}$ | $U_{33}$ | $U_{23}$ | $U_{13}$ | $U_{12}$ |
|------|----------|----------|----------|----------|----------|----------|
| C11  | 20.8(3)  | 27.9(4)  | 36.1(3)  | -12.6(3) | -3.7(2)  | 9.7(3)   |
| O1   | 16.1(8)  | 15.6(10) | 16.3(7)  | 1.0(6)   | -1.3(6)  | -1.1(6)  |
| O2   | 15.3(7)  | 18.7(11) | 12.9(8)  | -0.7(6)  | -0.4(6)  | -4.1(7)  |
| O5   | 17.6(8)  | 28.9(12) | 21.1(8)  | -5.2(8)  | -3.9(6)  | -0.5(8)  |
| O3   | 23.3(8)  | 24.2(11) | 14.2(7)  | -2.3(7)  | 3.1(6)   | -2.6(7)  |
| C3   | 15.1(11) | 16.6(14) | 17.6(11) | -2.8(9)  | -0.6(8)  | 4.5(9)   |
| C18  | 20.8(12) | 18.1(14) | 14.8(10) | 0.7(9)   | 5.3(8)   | 1.4(10)  |
| C11  | 14(1)    | 19.5(14) | 11.9(10) | -3.7(9)  | 1.0(8)   | -0.6(9)  |
| C17  | 12.3(10) | 20.3(13) | 13.3(10) | -3.6(10) | 2.9(7)   | -1.5(10) |
| C7   | 19.3(12) | 18.5(14) | 15.0(11) | -0.3(9)  | 0.3(9)   | -1.9(10) |
| C20  | 17.8(12) | 23.8(15) | 18.2(11) | -8.8(10) | 3.4(9)   | -3.6(10) |
| C16  | 15.0(11) | 17.1(14) | 13.6(10) | -3.9(9)  | 2.7(8)   | 0.8(9)   |
| C15  | 15.1(11) | 22.6(15) | 14.8(11) | -5.9(9)  | 2.9(8)   | 0.6(9)   |
| C4   | 15.1(11) | 16.6(13) | 16.1(10) | -2.2(9)  | -1.8(8)  | -0.8(9)  |
| C19  | 20.1(12) | 20.8(14) | 21.3(12) | -7.3(10) | 8.2(9)   | -7.7(10) |
| O4   | 24.2(9)  | 23.4(11) | 13.1(8)  | -5.2(7)  | 0.7(6)   | 3.8(8)   |
| C14  | 15.8(11) | 24.3(15) | 15.3(10) | -7.9(10) | -1.9(8)  | 1.2(10)  |
| C13  | 20.8(12) | 21.7(14) | 10.8(10) | -1.9(9)  | -1.2(9)  | 3.4(10)  |
| C10  | 17.2(11) | 21.3(14) | 13(1)    | 1.8(9)   | -0.3(8)  | -1.7(10) |
| C6   | 14.6(10) | 18.4(13) | 11.6(10) | 3.2(9)   | 0.1(8)   | -0.1(9)  |
| C5   | 16.0(11) | 18.0(14) | 11.7(10) | 3.5(9)   | 0.7(8)   | -0.2(9)  |
| C8   | 18.8(12) | 23.5(15) | 17.4(11) | 2.8(10)  | 1.3(9)   | 5.6(10)  |
| C9   | 13.7(11) | 29.4(16) | 15.4(10) | 3.1(10)  | -2.2(8)  | 0.6(10)  |
| C12  | 18.1(12) | 18.0(15) | 15.5(11) | -2.5(9)  | 2.7(8)   | -0.7(10) |
| C1   | 15.4(11) | 13.6(13) | 14.3(10) | 0.2(9)   | -1.6(8)  | -1.3(9)  |
| C2   | 12.9(10) | 19.4(14) | 16.3(10) | -2.2(9)  | -0.1(8)  | 0.0(9)   |

Table 4 Bond Lengths for exp\_6109.

| Atom | Atom | Length/ $\text{\AA}$ | Atom | Atom | Length/ $\text{\AA}$ |
|------|------|----------------------|------|------|----------------------|
| C11  | C3   | 1.800(2)             | C7   | C8   | 1.386(3)             |
| O1   | C17  | 1.394(3)             | C20  | C15  | 1.417(4)             |
| O1   | C1   | 1.431(3)             | C20  | C19  | 1.375(4)             |
| O2   | C11  | 1.383(3)             | C16  | C15  | 1.426(3)             |
| O2   | C1   | 1.428(3)             | C15  | C14  | 1.423(4)             |
| O5   | C10  | 1.366(3)             | C4   | O4   | 1.440(3)             |
| O3   | C2   | 1.426(3)             | C4   | C5   | 1.516(3)             |
| C3   | C4   | 1.540(3)             | C14  | C13  | 1.369(4)             |
| C3   | C2   | 1.512(4)             | C13  | C12  | 1.419(3)             |
| C18  | C17  | 1.365(4)             | C10  | C5   | 1.407(3)             |
| C18  | C19  | 1.420(3)             | C10  | C9   | 1.386(4)             |
| C11  | C16  | 1.413(4)             | C6   | C5   | 1.390(4)             |
| C11  | C12  | 1.371(3)             | C6   | C1   | 1.520(3)             |
| C17  | C16  | 1.410(3)             | C8   | C9   | 1.389(4)             |
| C7   | C6   | 1.394(4)             | C1   | C2   | 1.546(3)             |

Table 5 Bond Angles for exp\_6109.

| Atom | Atom | Atom | Angle/°    | Atom | Atom | Atom | Angle/°    |
|------|------|------|------------|------|------|------|------------|
| C17  | O1   | C1   | 114.88(19) | C13  | C14  | C15  | 120.7(2)   |
| C11  | O2   | C1   | 115.14(17) | C14  | C13  | C12  | 121.7(2)   |
| C4   | C3   | C11  | 109.09(16) | O5   | C10  | C5   | 121.8(2)   |
| C2   | C3   | C11  | 111.37(17) | O5   | C10  | C9   | 117.6(2)   |
| C2   | C3   | C4   | 112.2(2)   | C9   | C10  | C5   | 120.6(2)   |
| C17  | C18  | C19  | 118.9(2)   | C7   | C6   | C1   | 118.7(2)   |
| O2   | C11  | C16  | 118.8(2)   | C5   | C6   | C7   | 120.5(2)   |
| C12  | C11  | O2   | 119.7(2)   | C5   | C6   | C1   | 120.8(2)   |
| C12  | C11  | C16  | 121.4(2)   | C10  | C5   | C4   | 117.5(2)   |
| O1   | C17  | C16  | 118.1(2)   | C6   | C5   | C4   | 123.8(2)   |
| C18  | C17  | O1   | 120.6(2)   | C6   | C5   | C10  | 118.7(2)   |
| C18  | C17  | C16  | 121.2(2)   | C7   | C8   | C9   | 120.2(2)   |
| C8   | C7   | C6   | 120.0(2)   | C10  | C9   | C8   | 119.8(2)   |
| C19  | C20  | C15  | 120.5(2)   | C11  | C12  | C13  | 118.5(2)   |
| C11  | C16  | C15  | 120.0(2)   | O1   | C1   | C6   | 107.1(2)   |
| C17  | C16  | C11  | 119.8(2)   | O1   | C1   | C2   | 109.65(18) |
| C17  | C16  | C15  | 120.1(2)   | O2   | C1   | O1   | 111.35(18) |
| C20  | C15  | C16  | 117.9(2)   | O2   | C1   | C6   | 106.69(18) |
| C20  | C15  | C14  | 124.5(2)   | O2   | C1   | C2   | 110.1(2)   |
| C14  | C15  | C16  | 117.6(2)   | C6   | C1   | C2   | 111.90(19) |
| O4   | C4   | C3   | 112.13(18) | O3   | C2   | C3   | 113.89(19) |
| O4   | C4   | C5   | 107.08(19) | O3   | C2   | C1   | 109.0(2)   |
| C5   | C4   | C3   | 110.47(19) | C3   | C2   | C1   | 106.94(19) |
| C20  | C19  | C18  | 121.4(2)   |      |      |      |            |

Table 6 Torsion Angles for exp\_6109.

| A   | B   | C   | D   | Angle/°     |
|-----|-----|-----|-----|-------------|
| C11 | C3  | C4  | O4  | -48.4(3)    |
| C11 | C3  | C4  | C5  | -167.80(16) |
| C11 | C3  | C2  | O3  | 69.8(2)     |
| C11 | C3  | C2  | C1  | -169.81(15) |
| O1  | C17 | C16 | C11 | 0.0(3)      |
| O1  | C17 | C16 | C15 | -177.0(2)   |
| O1  | C1  | C2  | O3  | -47.2(2)    |
| O1  | C1  | C2  | C3  | -170.77(17) |
| O2  | C11 | C16 | C17 | 1.3(3)      |
| O2  | C11 | C16 | C15 | 178.2(2)    |
| O2  | C11 | C12 | C13 | -179.6(2)   |
| O2  | C1  | C2  | O3  | -170.08(18) |
| O2  | C1  | C2  | C3  | 66.4(2)     |
| O5  | C10 | C5  | C4  | -4.0(3)     |
| O5  | C10 | C5  | C6  | 177.6(2)    |
| O5  | C10 | C9  | C8  | 178.5(2)    |
| C3  | C4  | C5  | C10 | -172.3(2)   |
| C3  | C4  | C5  | C6  | 6.1(3)      |
| C18 | C17 | C16 | C11 | 174.9(2)    |
| C18 | C17 | C16 | C15 | -2.0(4)     |
| C11 | O2  | C1  | O1  | -50.6(3)    |
| C11 | O2  | C1  | C6  | -167.1(2)   |
| C11 | O2  | C1  | C2  | 71.3(3)     |
| C11 | C16 | C15 | C20 | -177.0(2)   |
| C11 | C16 | C15 | C14 | 0.4(3)      |
| C17 | O1  | C1  | O2  | 51.8(2)     |
| C17 | O1  | C1  | C6  | 168.11(16)  |
| C17 | O1  | C1  | C2  | -70.3(2)    |
| C17 | C18 | C19 | C20 | -0.2(4)     |
| C17 | C16 | C15 | C20 | -0.1(3)     |
| C17 | C16 | C15 | C14 | 177.4(2)    |
| C7  | C6  | C5  | C4  | -172.9(2)   |
| C7  | C6  | C5  | C10 | 5.4(3)      |
| C7  | C6  | C1  | O1  | -42.9(3)    |
| C7  | C6  | C1  | O2  | 76.4(3)     |

|     |     |     |     |           |
|-----|-----|-----|-----|-----------|
| C7  | C6  | C1  | C2  | -163.1(2) |
| C7  | C8  | C9  | C10 | 2.5(4)    |
| C20 | C15 | C14 | C13 | 176.5(2)  |
| C16 | C11 | C12 | C13 | -2.8(4)   |
| C16 | C15 | C14 | C13 | -0.7(4)   |
| C15 | C20 | C19 | C18 | -1.8(4)   |
| C15 | C14 | C13 | C12 | -0.8(4)   |
| C4  | C3  | C2  | O3  | -52.9(3)  |
| C4  | C3  | C2  | C1  | 67.6(2)   |
| C19 | C18 | C17 | O1  | 177.0(2)  |
| C19 | C18 | C17 | C16 | 2.1(4)    |
| C19 | C20 | C15 | C16 | 1.9(3)    |
| C19 | C20 | C15 | C14 | -175.3(2) |
| O4  | C4  | C5  | C10 | 65.4(3)   |
| O4  | C4  | C5  | C6  | -116.3(2) |
| C14 | C13 | C12 | C11 | 2.5(4)    |
| C6  | C7  | C8  | C9  | -0.6(4)   |
| C6  | C1  | C2  | O3  | 71.4(2)   |
| C6  | C1  | C2  | C3  | -52.1(2)  |
| C5  | C10 | C9  | C8  | -0.4(4)   |
| C5  | C6  | C1  | O1  | 137.3(2)  |
| C5  | C6  | C1  | O2  | -103.4(2) |
| C5  | C6  | C1  | C2  | 17.1(3)   |
| C8  | C7  | C6  | C5  | -3.4(4)   |
| C8  | C7  | C6  | C1  | 176.8(2)  |
| C9  | C10 | C5  | C4  | 174.9(2)  |
| C9  | C10 | C5  | C6  | -3.5(3)   |
| C12 | C11 | C16 | C17 | -175.6(2) |
| C12 | C11 | C16 | C15 | 1.4(4)    |
| C1  | O1  | C17 | C18 | 158.1(2)  |
| C1  | O1  | C17 | C16 | -26.9(3)  |
| C1  | O2  | C11 | C16 | 24.6(3)   |
| C1  | O2  | C11 | C12 | -158.5(2) |
| C1  | C6  | C5  | C4  | 6.9(3)    |
| C1  | C6  | C5  | C10 | -174.8(2) |
| C2  | C3  | C4  | O4  | 75.5(3)   |
| C2  | C3  | C4  | C5  | -43.9(3)  |
